# Supplementary material
Source: MDPI journal article supplement (https://www.mdpi.com/1996-1073/12/19/3641)
Supplement: s1 [file s1]

Archive with 2 entries (2 files):
- SOM-1.pdf
- SOM-2.pdf
