# Supplementary material
Source: MDPI journal article supplement (https://www.mdpi.com/1996-1073/12/19/3641)
Supplement: s1 [file s1 › SOM-2.pdf]

# Supplementary Materials: Generalized Extreme Value Statistics, Physical Scaling and Forecasts of Oil Production in the Bakken Shale

Wardana Saputra 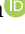, Wissem Kirati and Tadeusz Patzek \* 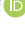

- 1 Supporting Online Materials-2: Infill Potential Maps and Infill Drilling Schedules

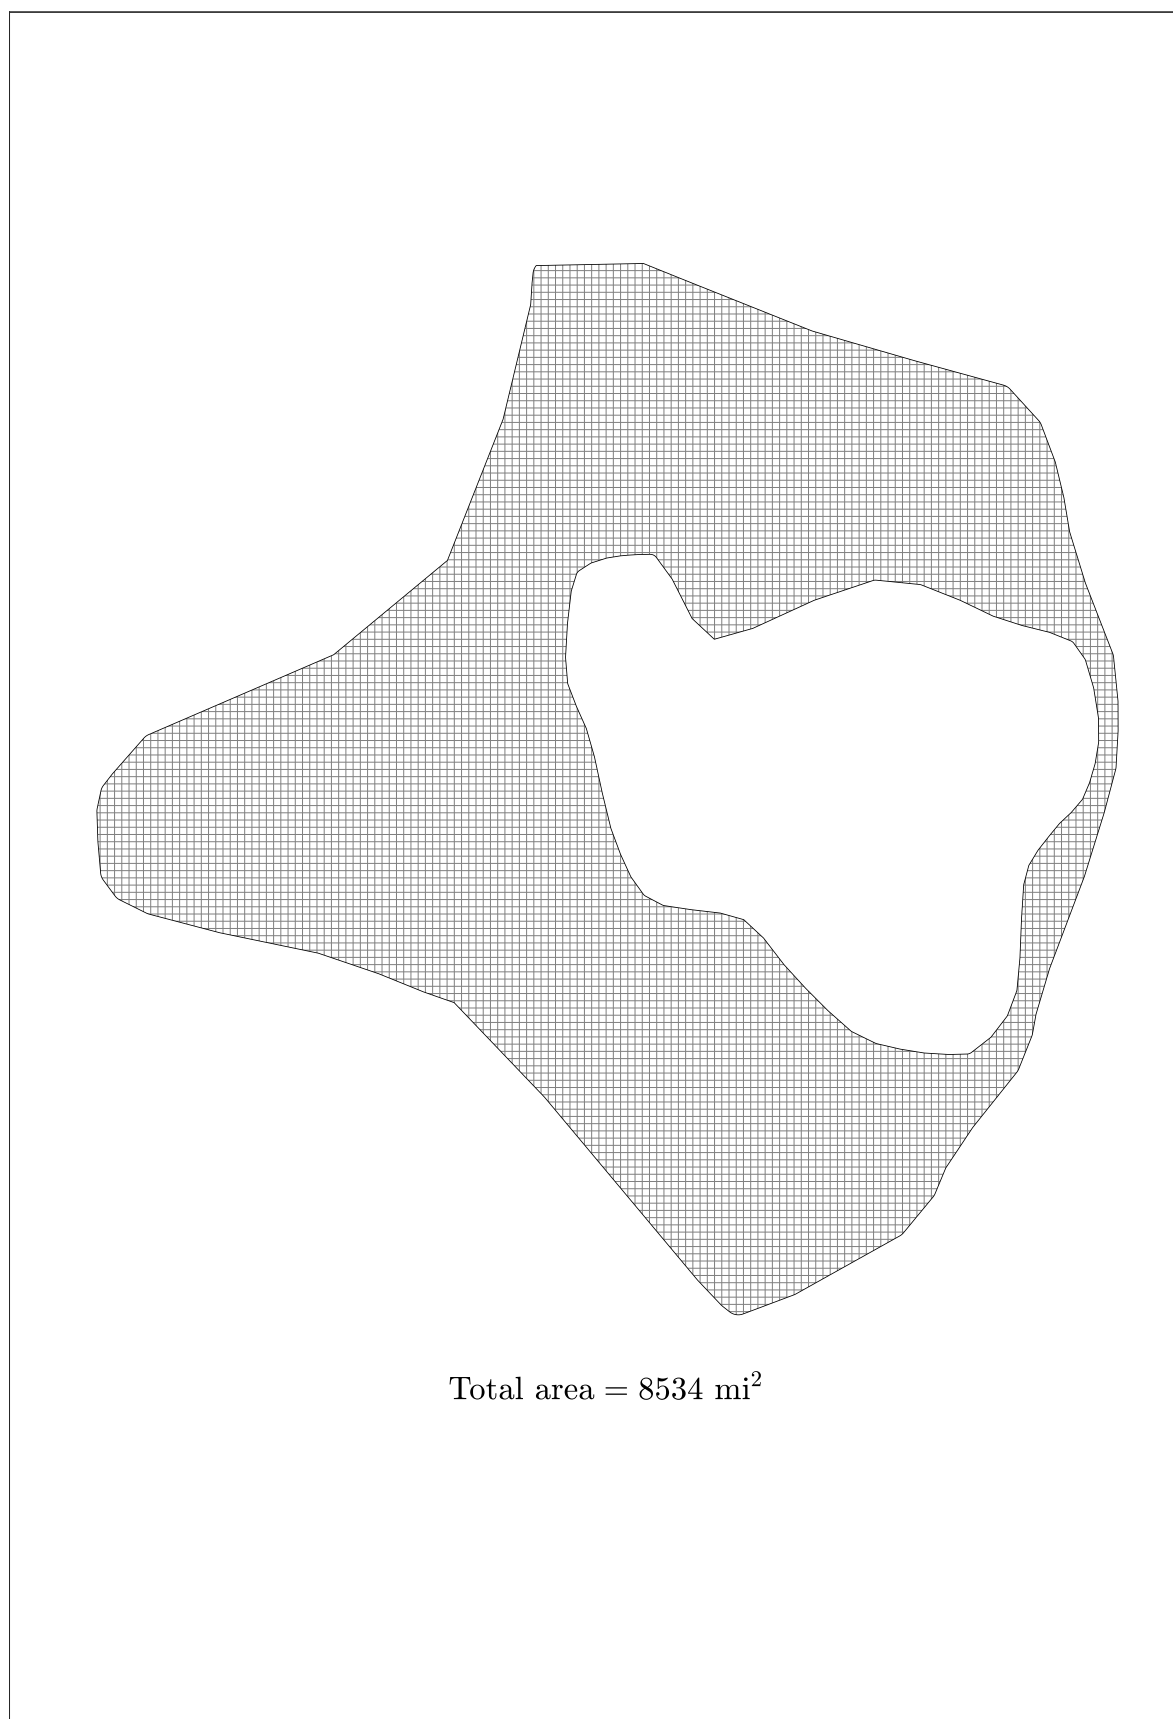

**Figure S1.** One-square-mile fishnet gridding of Middle Bakken noncore.

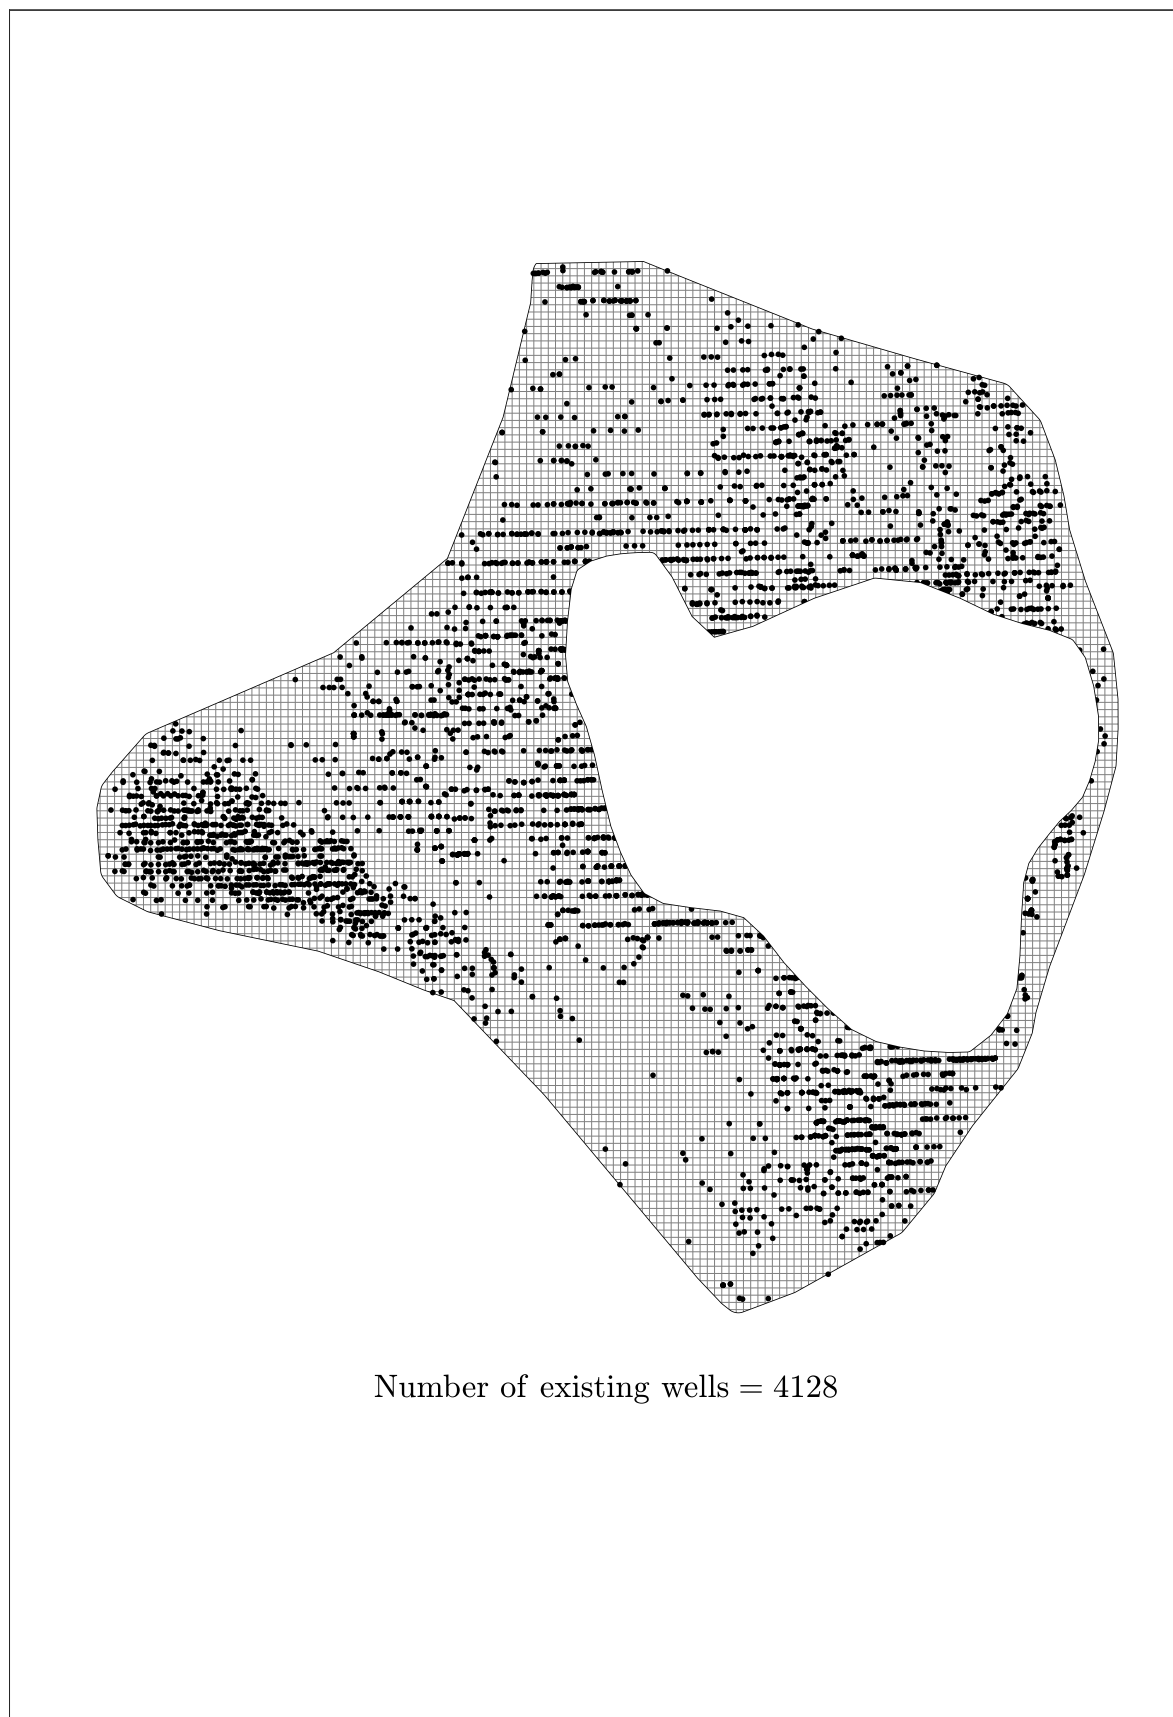

**Figure S2.** Map of wellhead locations in the Middle Bakken noncore.

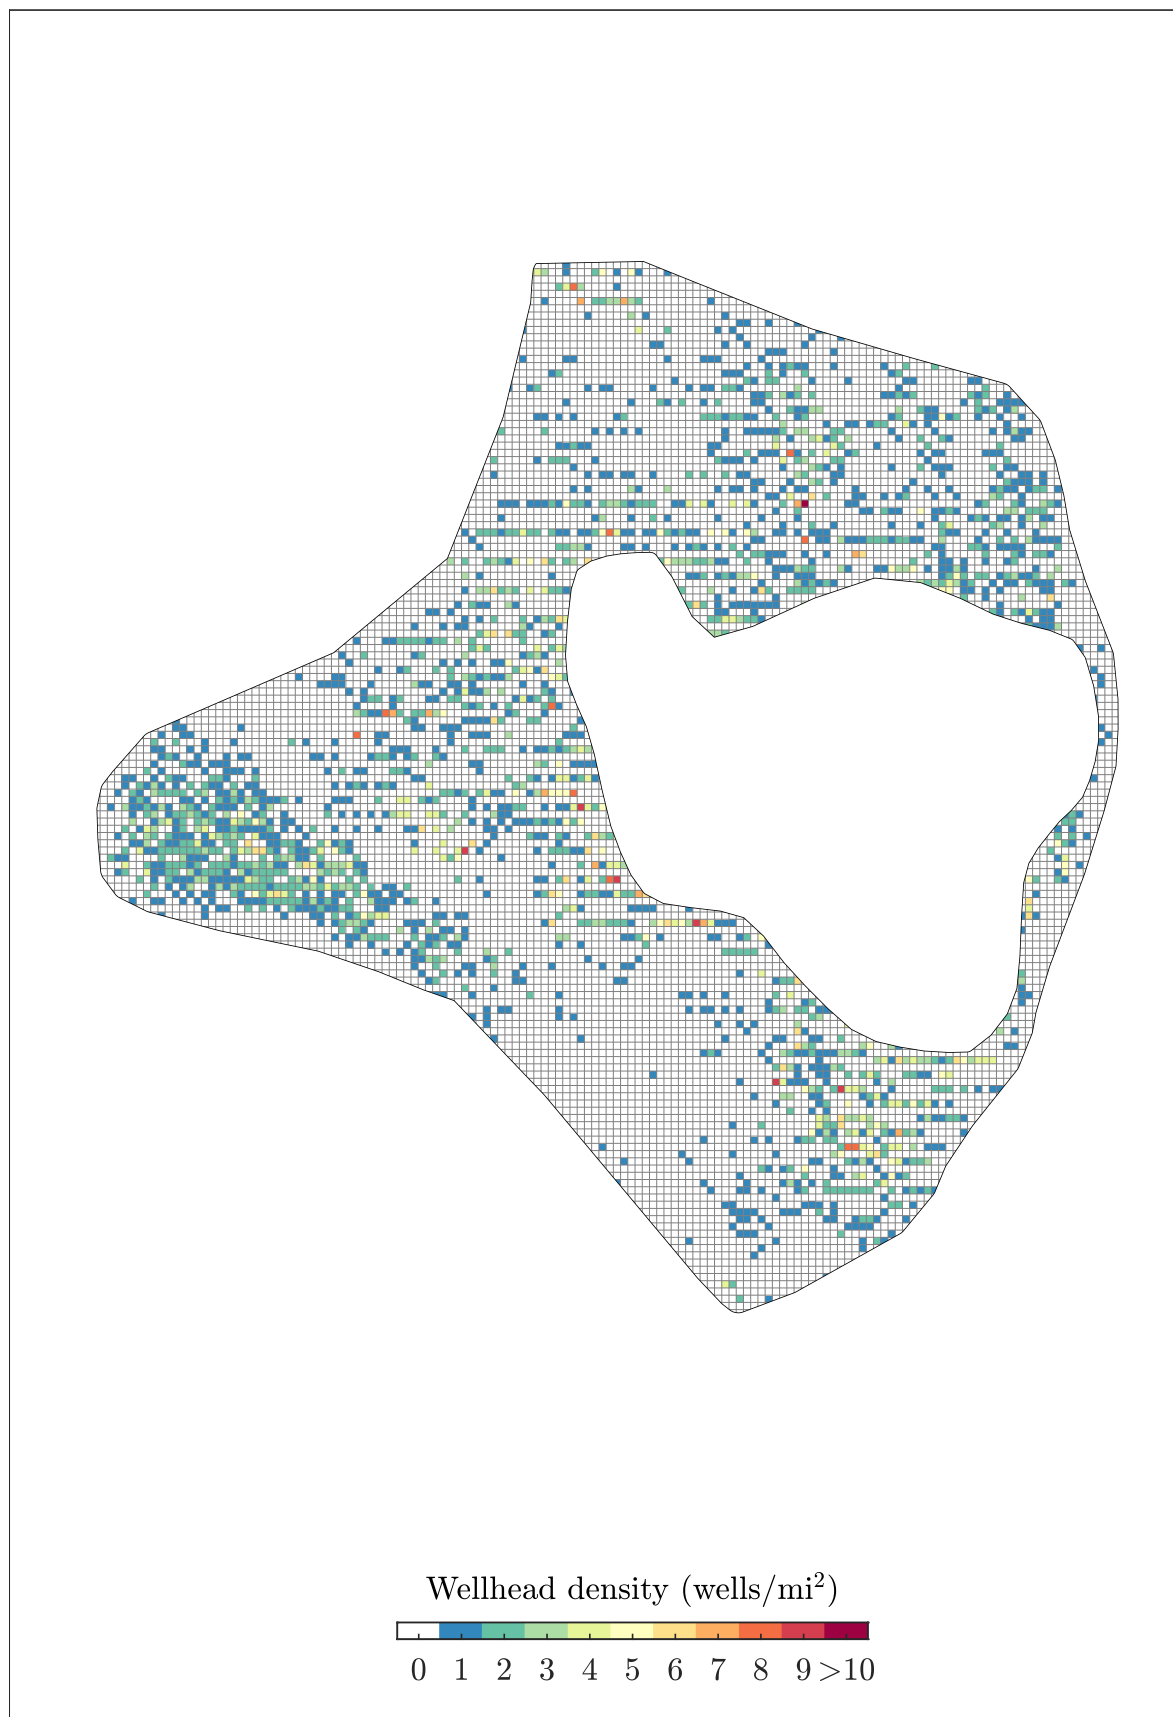

**Figure S3.** Map of wellhead density in the Middle Bakken noncore.

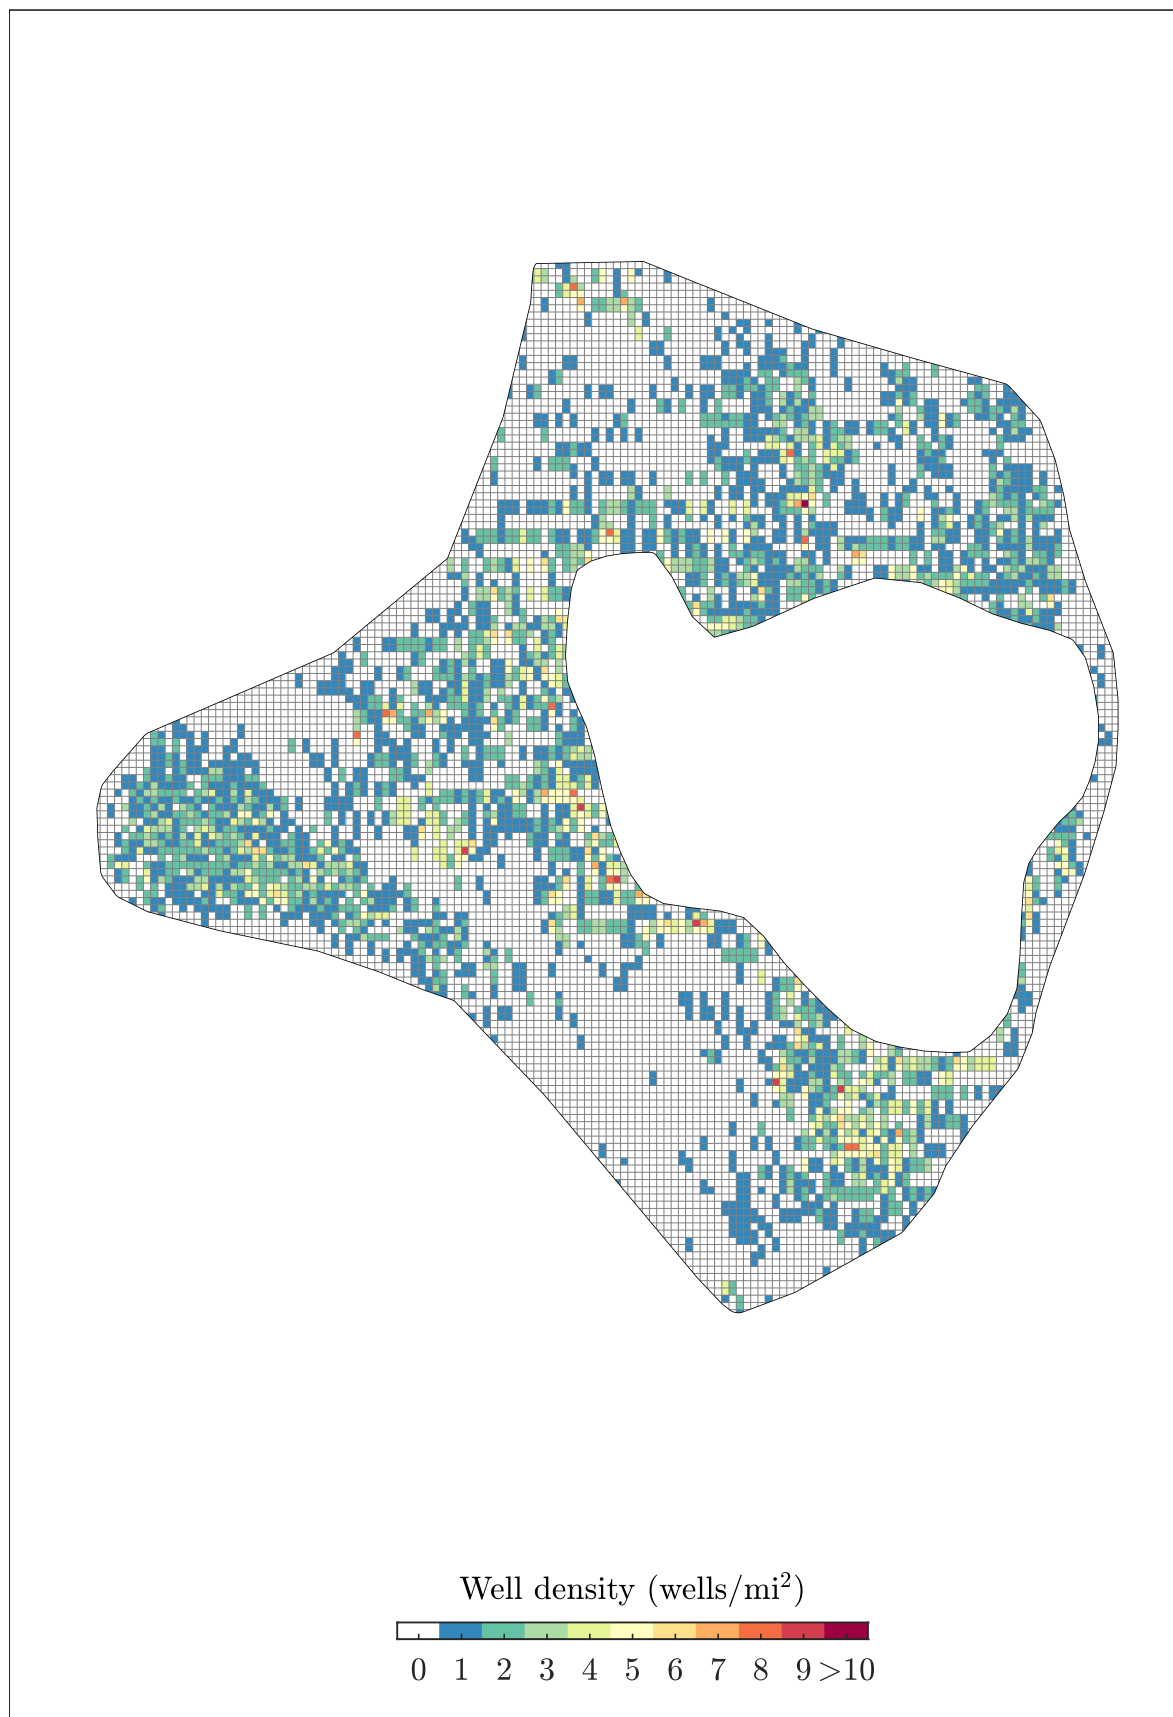

**Figure S4.** Map of well density in the Middle Bakken noncore.

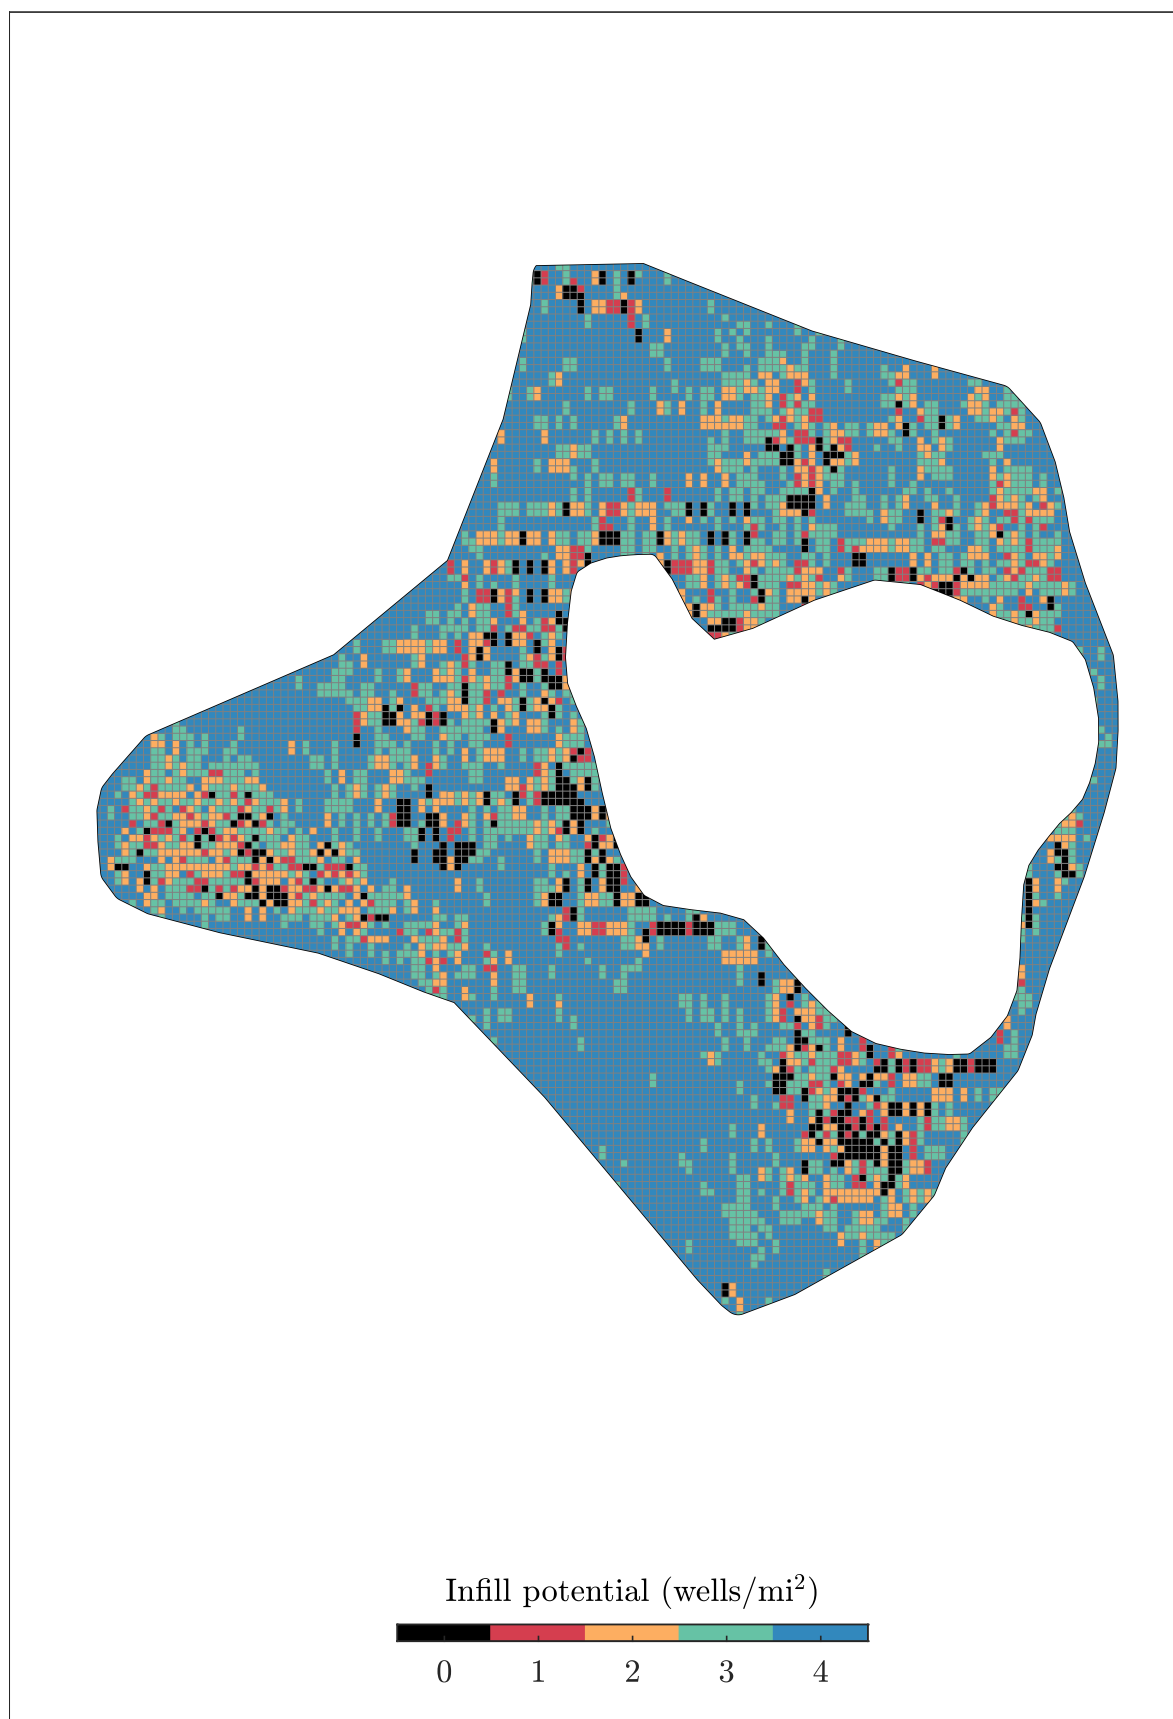

**Figure S5.** Map of infill potential in the Middle Bakken noncore.

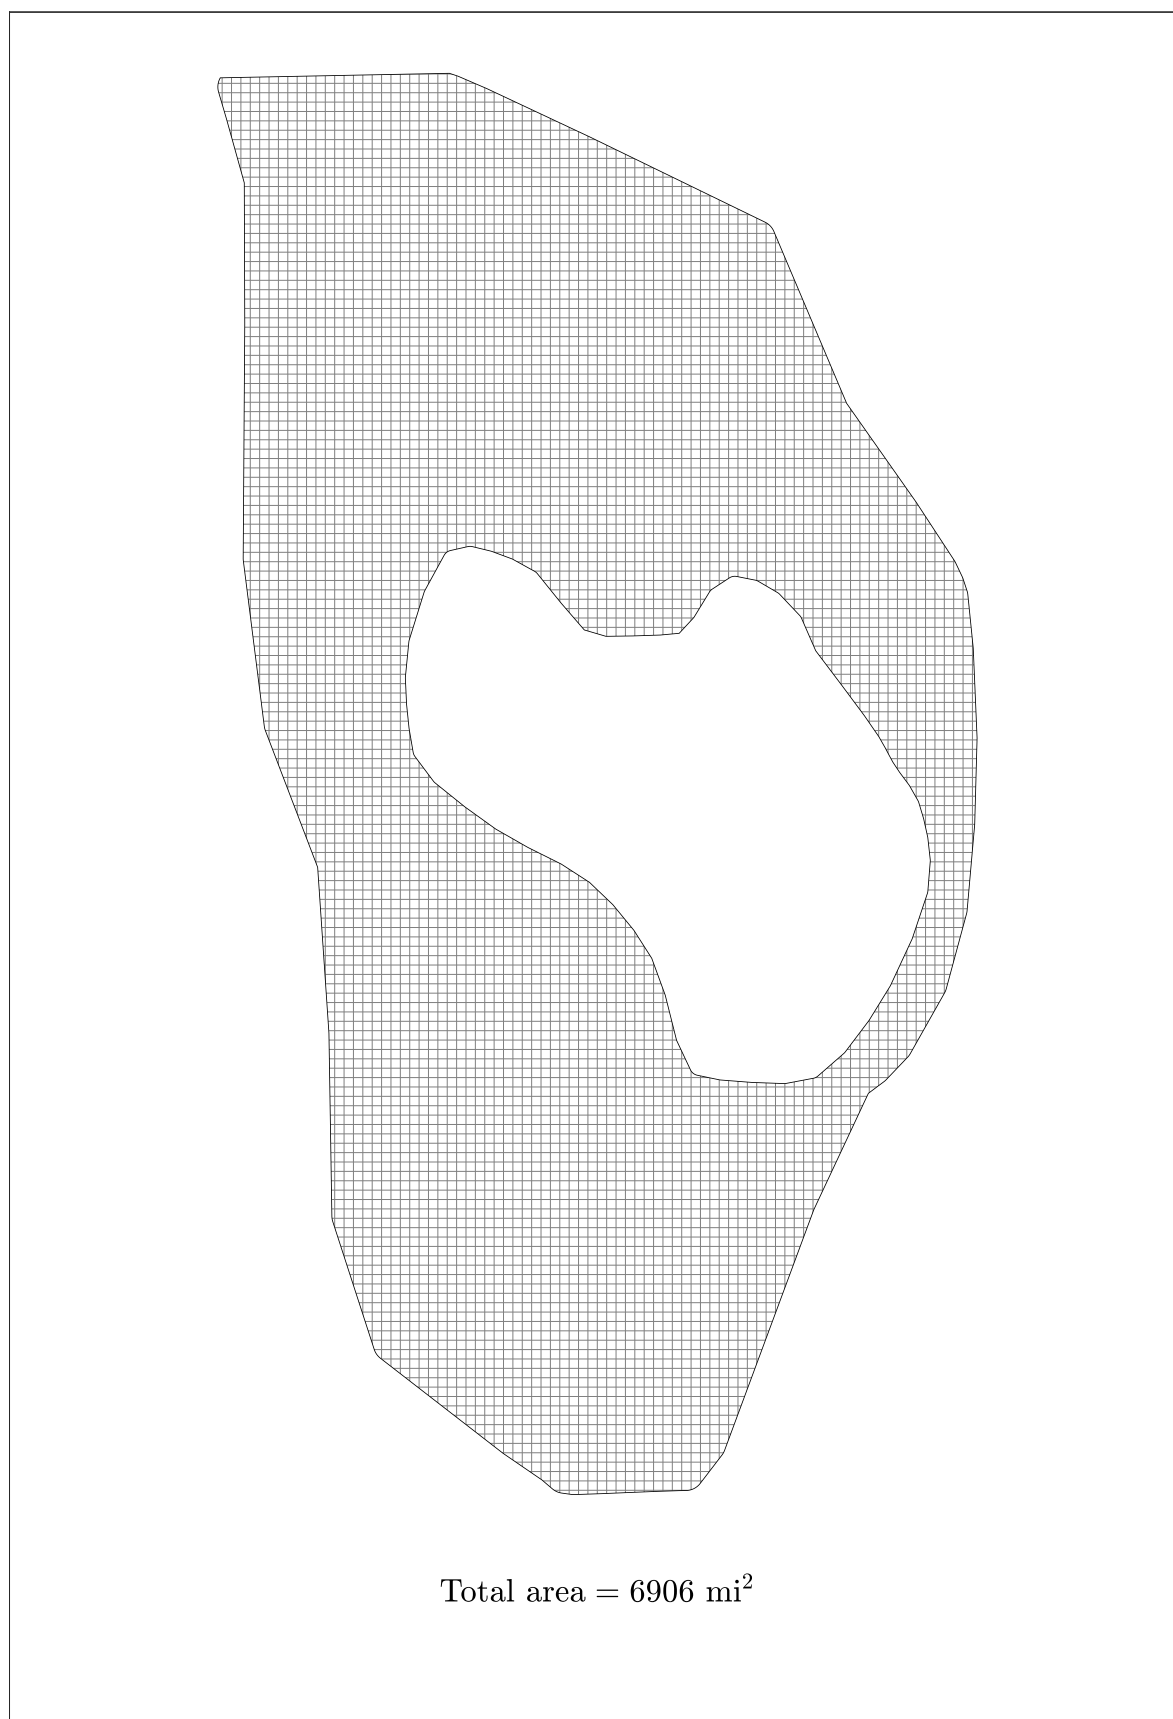

**Figure S6.** One-square-mile fishnet gridding of Three Forks noncore.

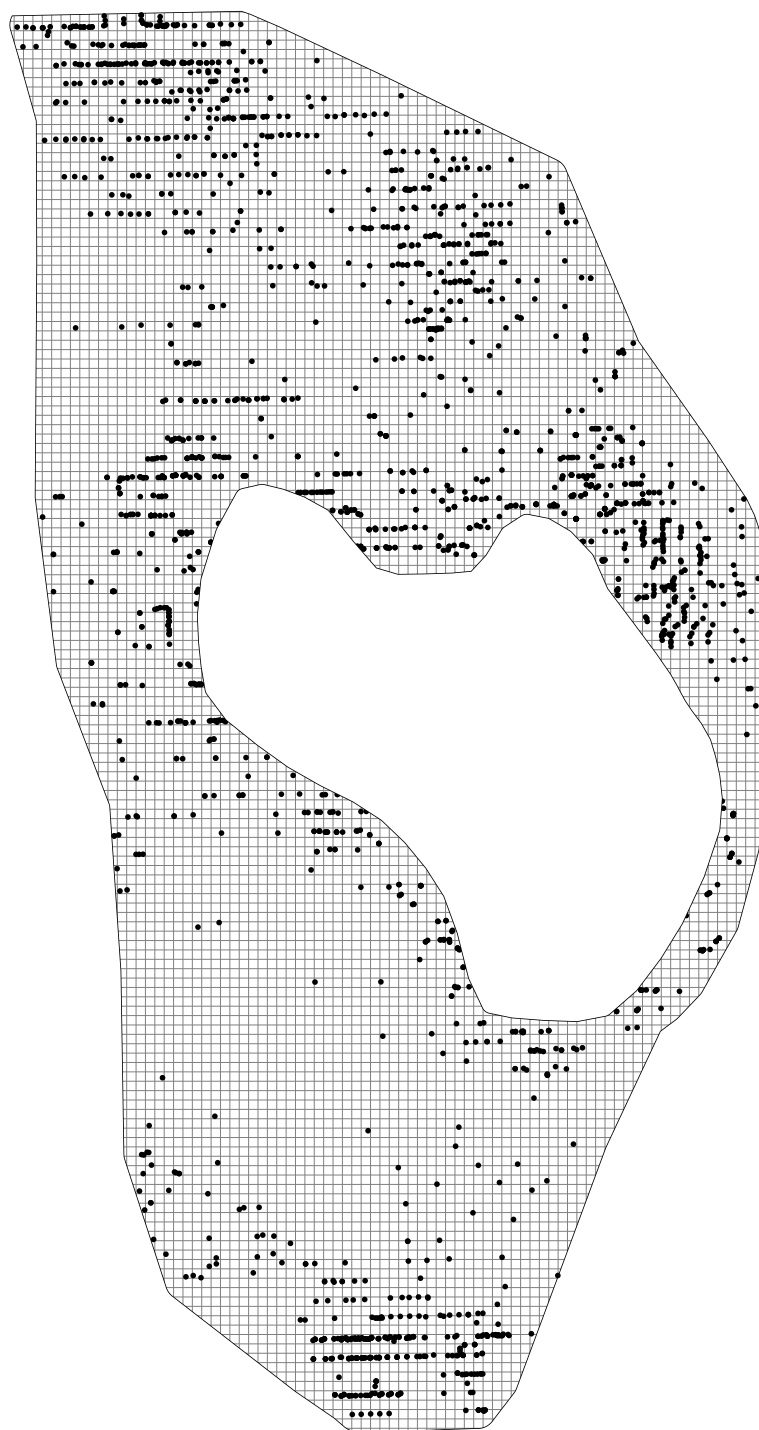

Number of existing wells = 2146

Figure S7. Map of wellhead locations in the Three Forks noncore.

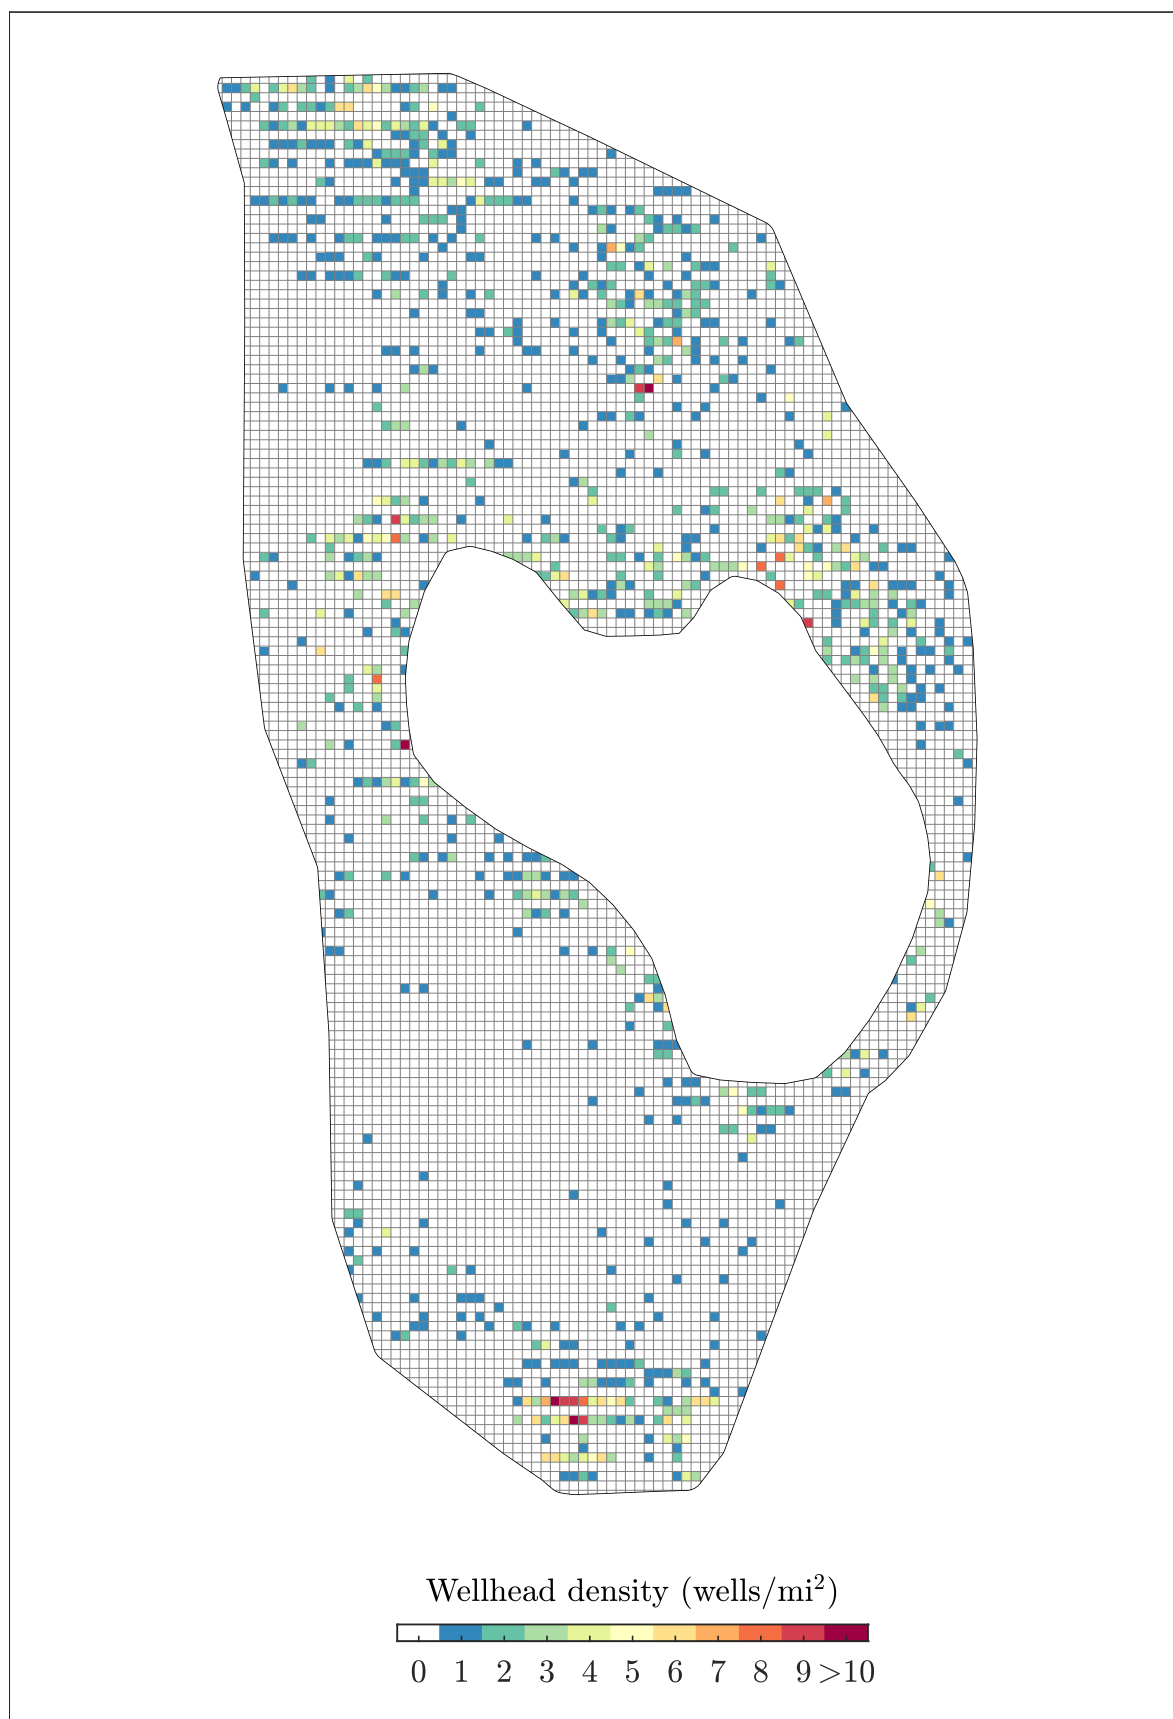

**Figure S8.** Map of wellhead density in the Three Forks noncore.

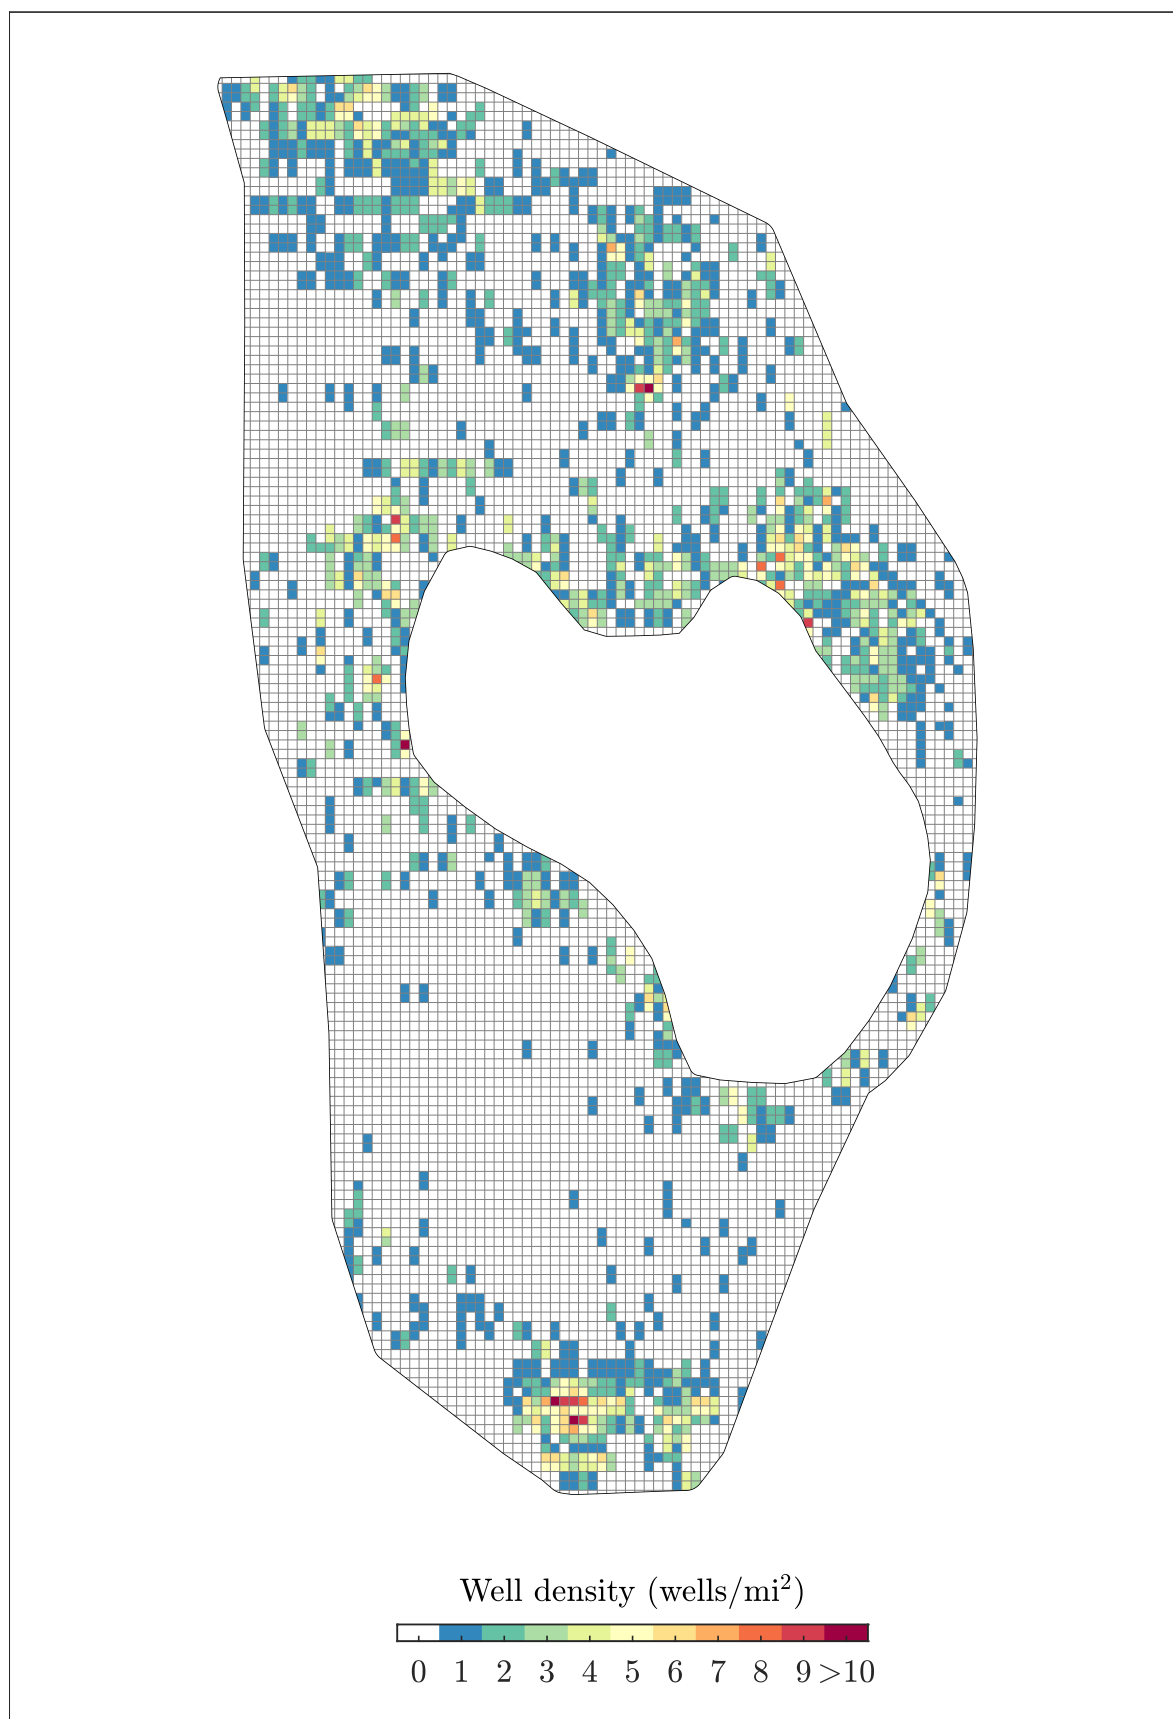

**Figure S9.** Map of well density in the Three Forks noncore.

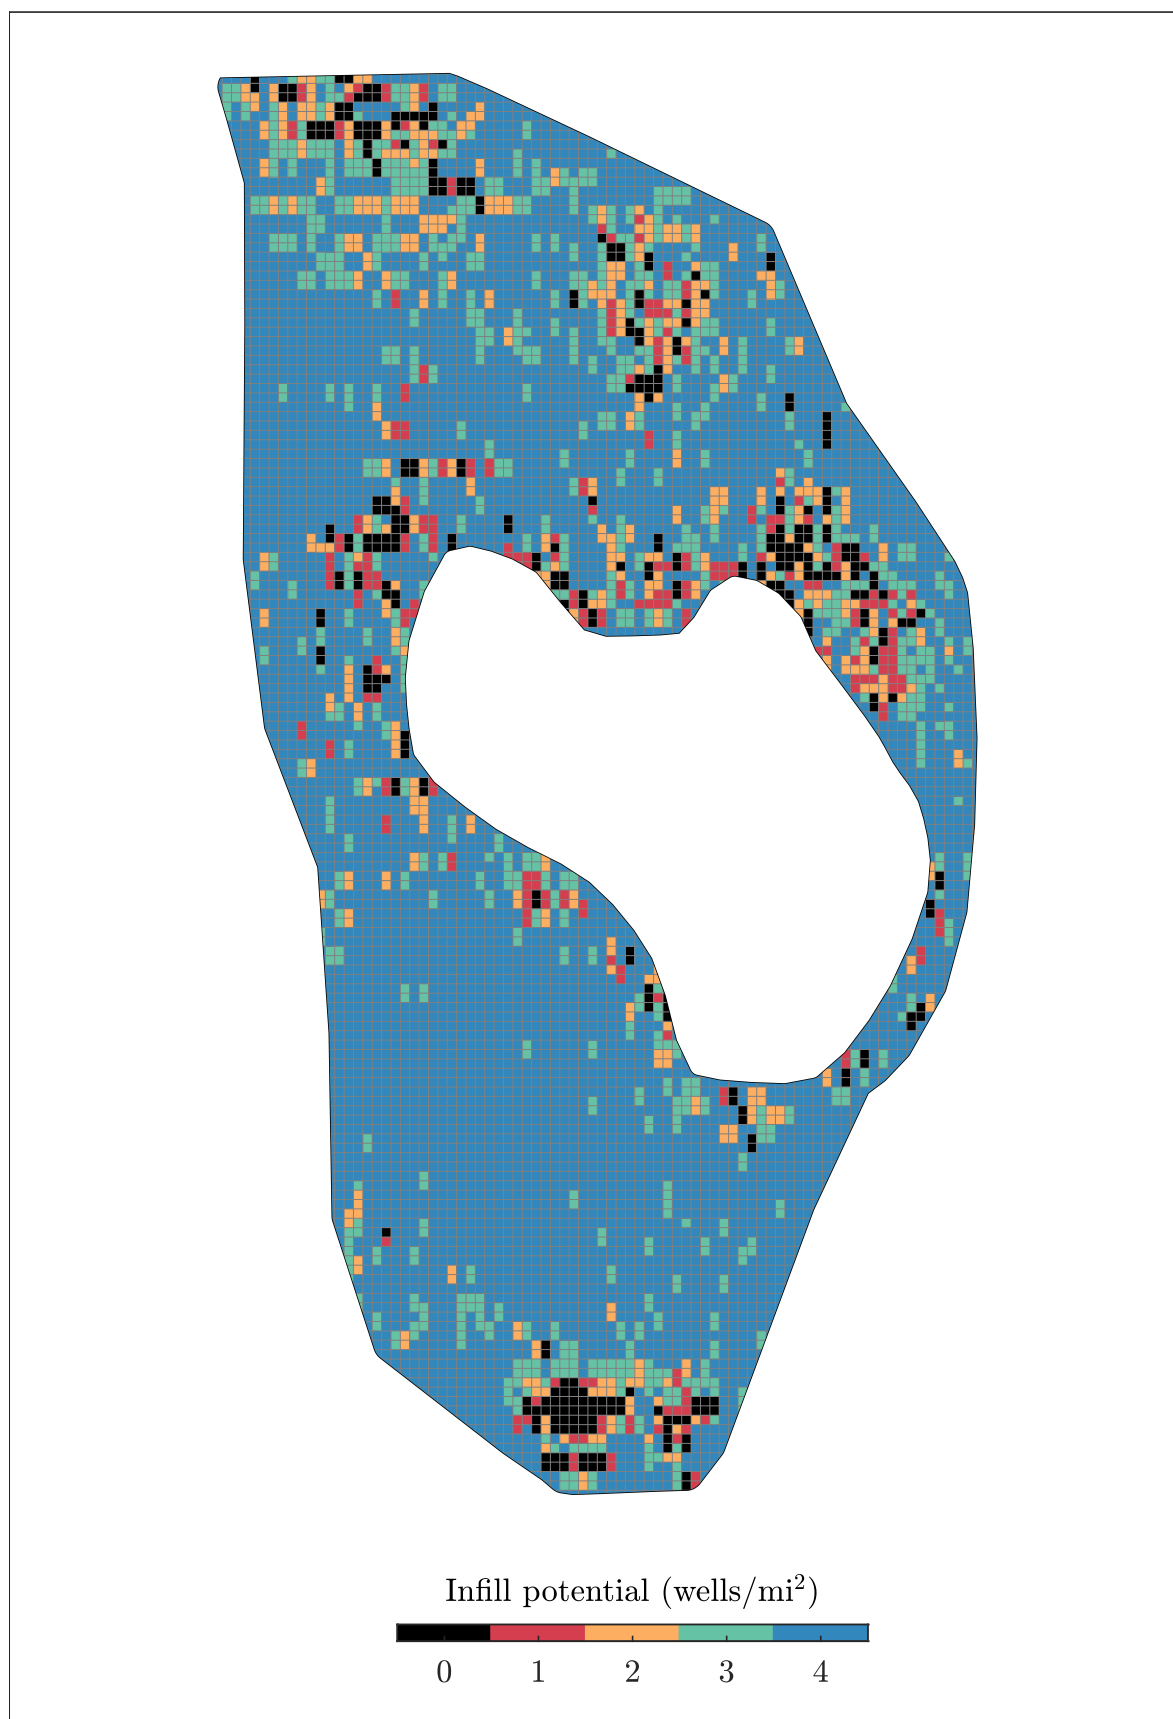

**Figure S10.** Map of infill potential in the Three Forks noncore.

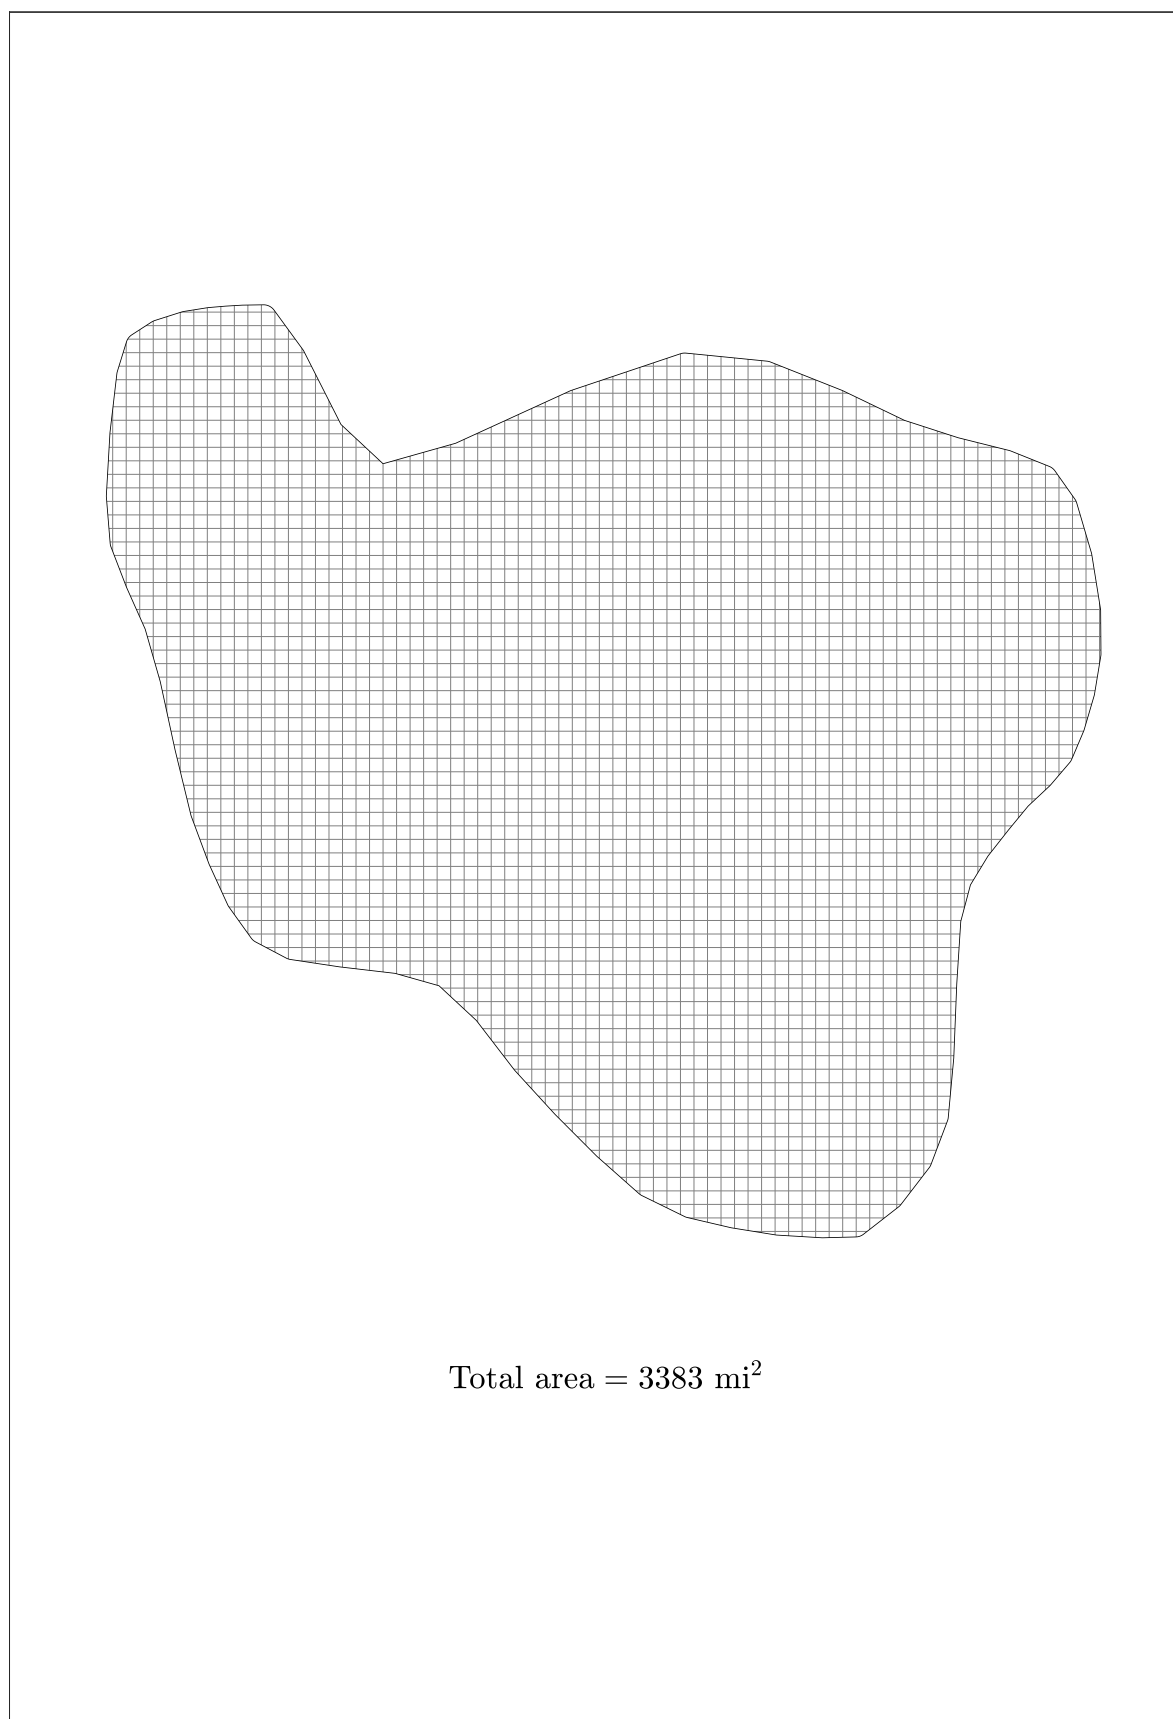

**Figure S11.** One-square-mile fishnet gridding of Middle Bakken core.

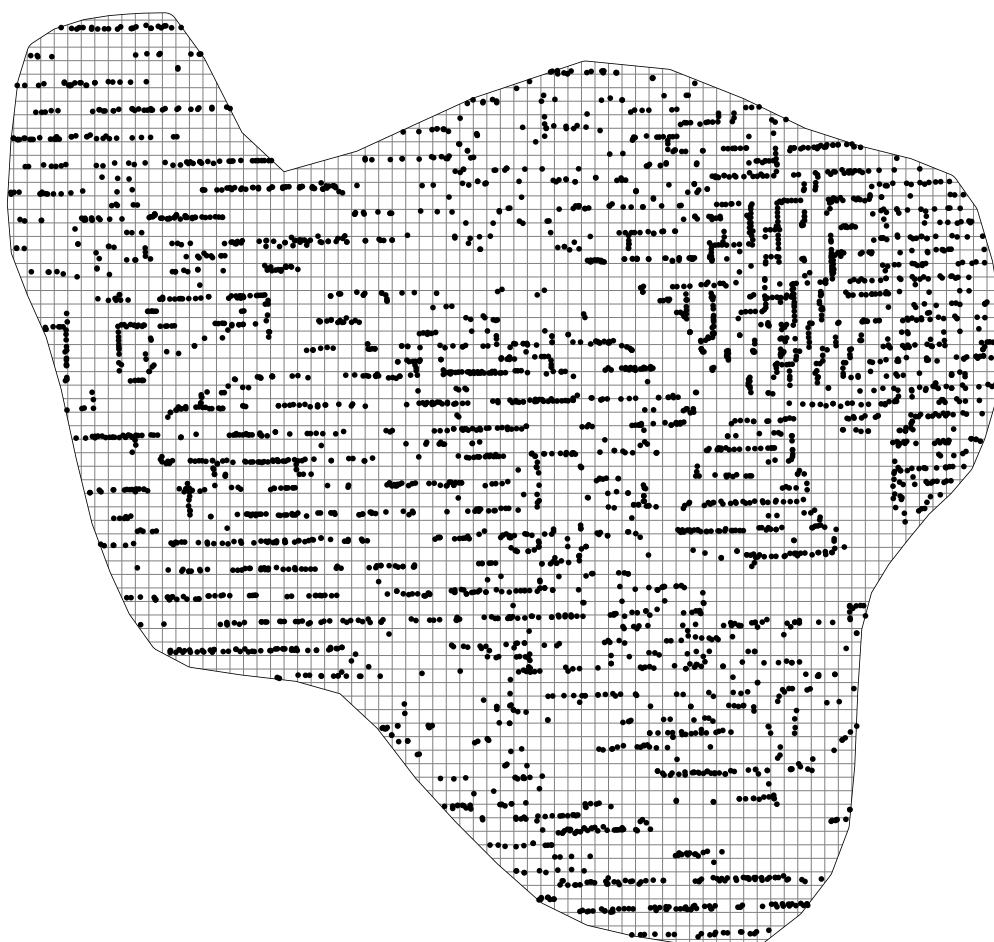

Number of existing wells = 5732

Figure S12. Map of wellhead locations in the Middle Bakken core.

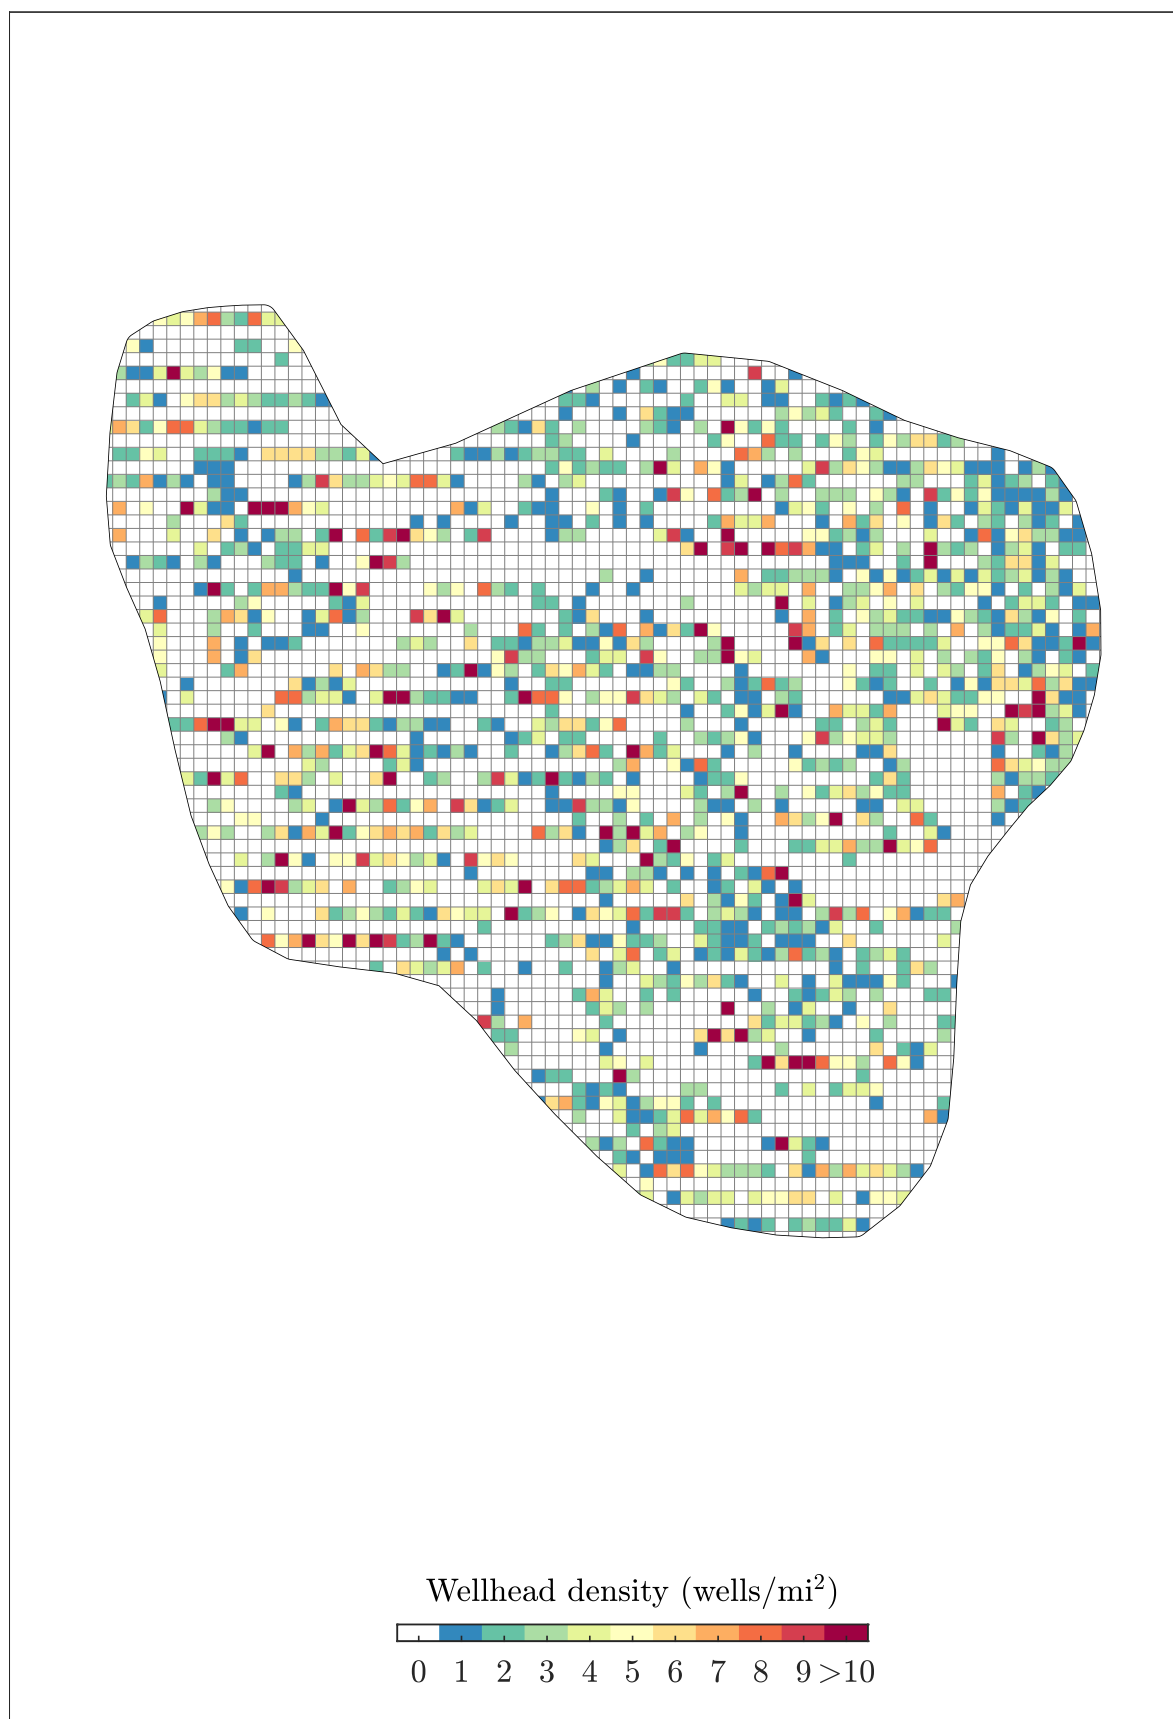

**Figure S13.** Map of wellhead density in the Middle Bakken core.

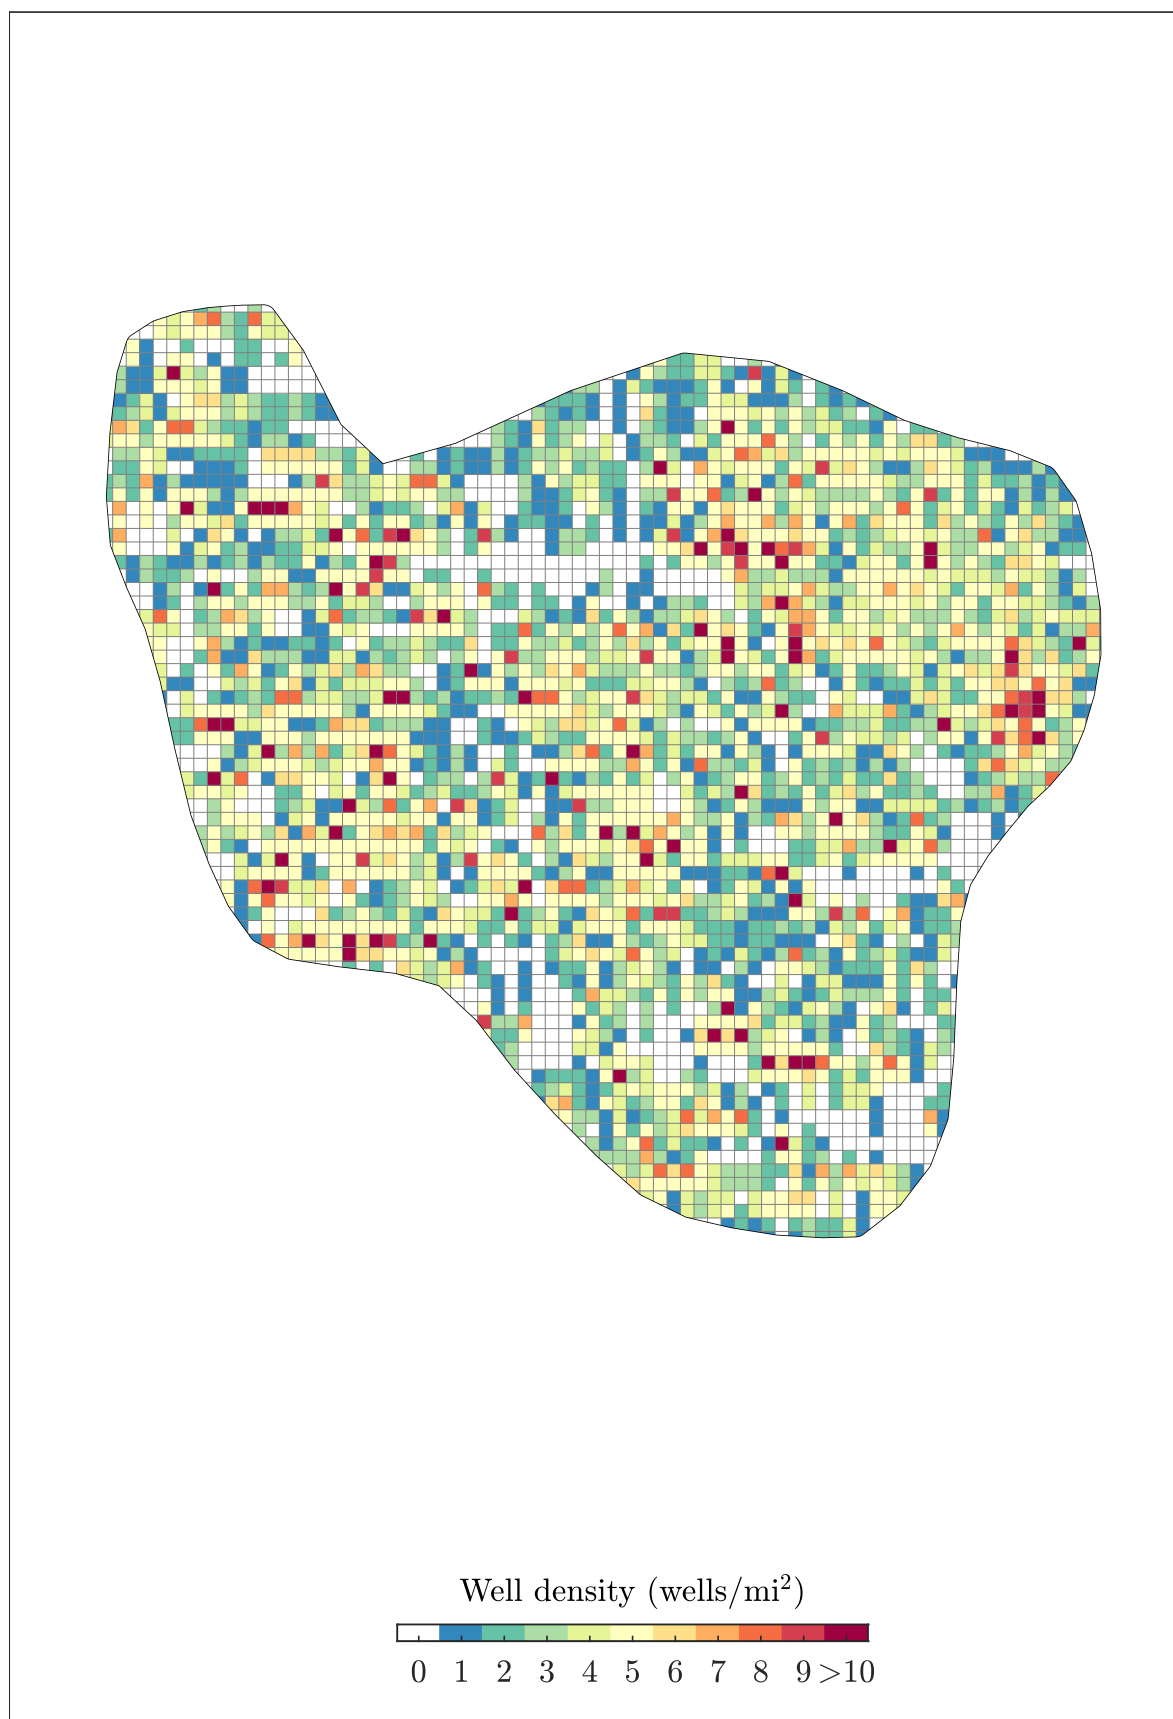

**Figure S14.** Map of well density in the Middle Bakken core.

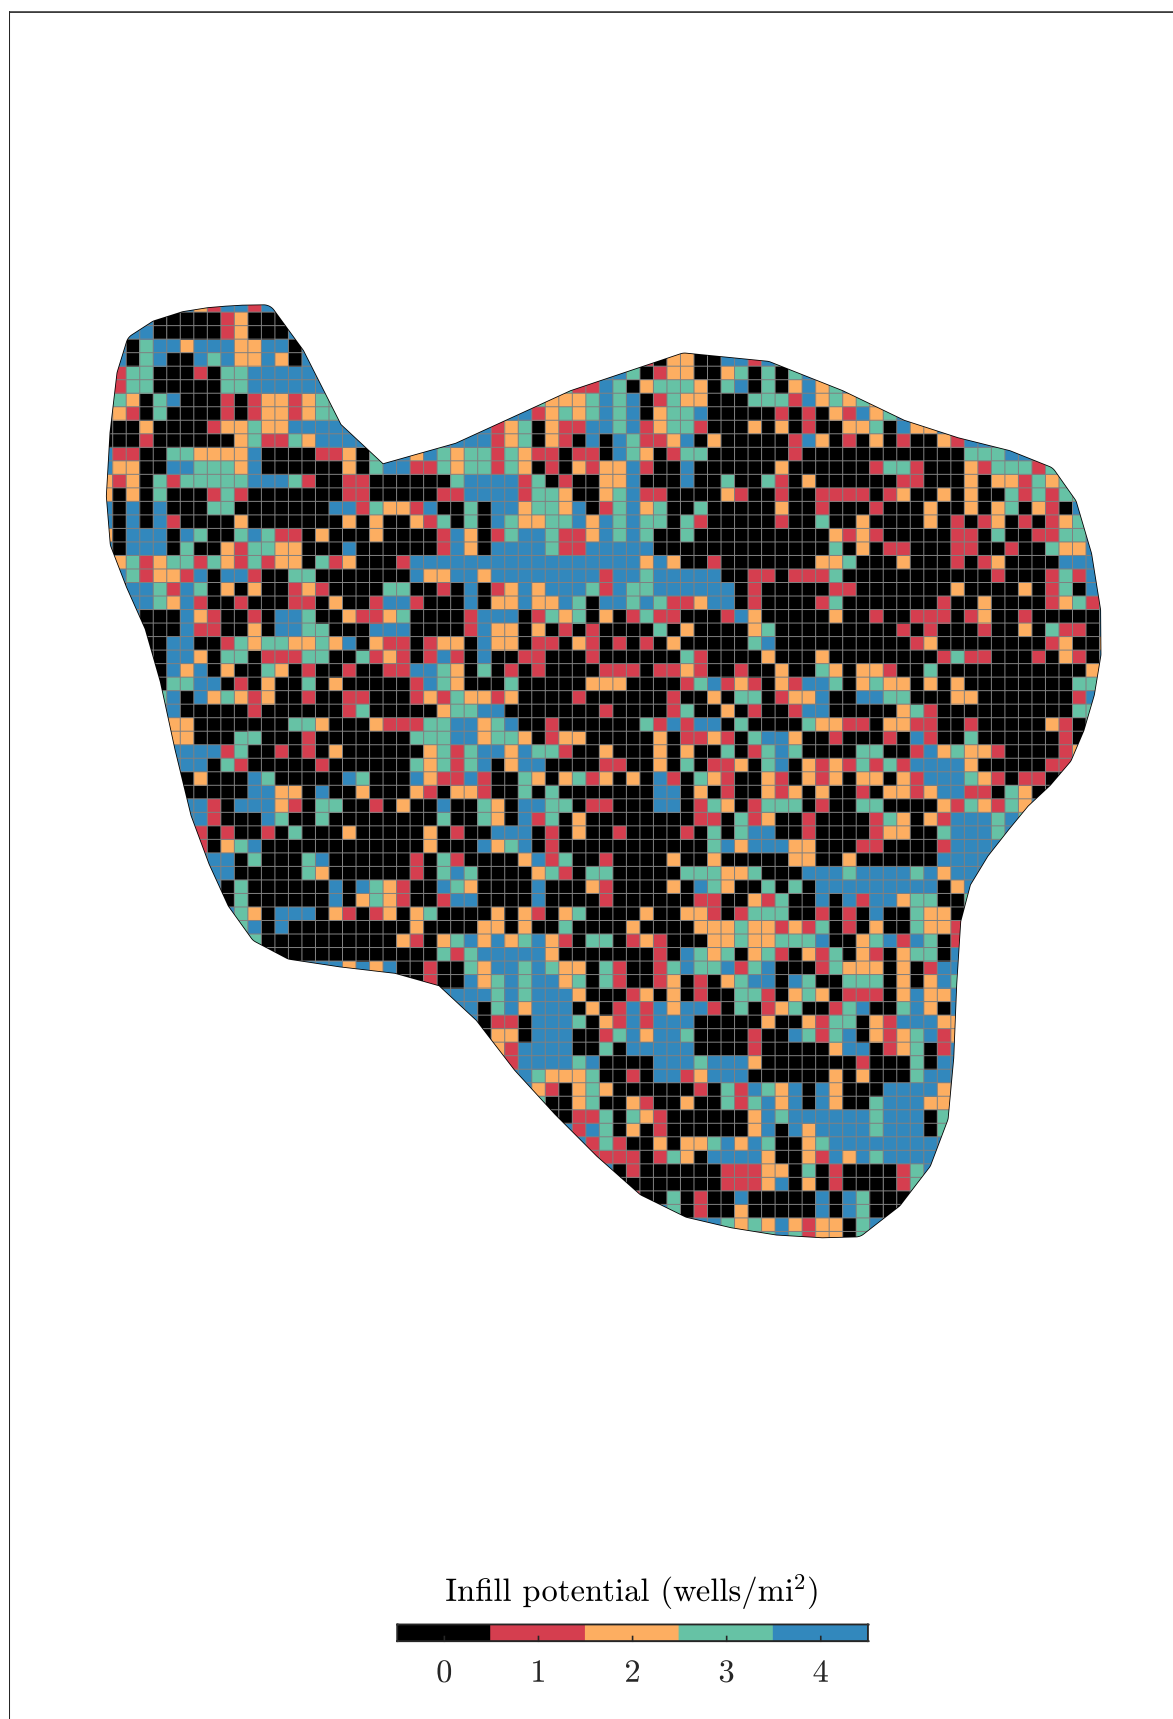

**Figure S15.** Map of infill potential in the Middle Bakken core.

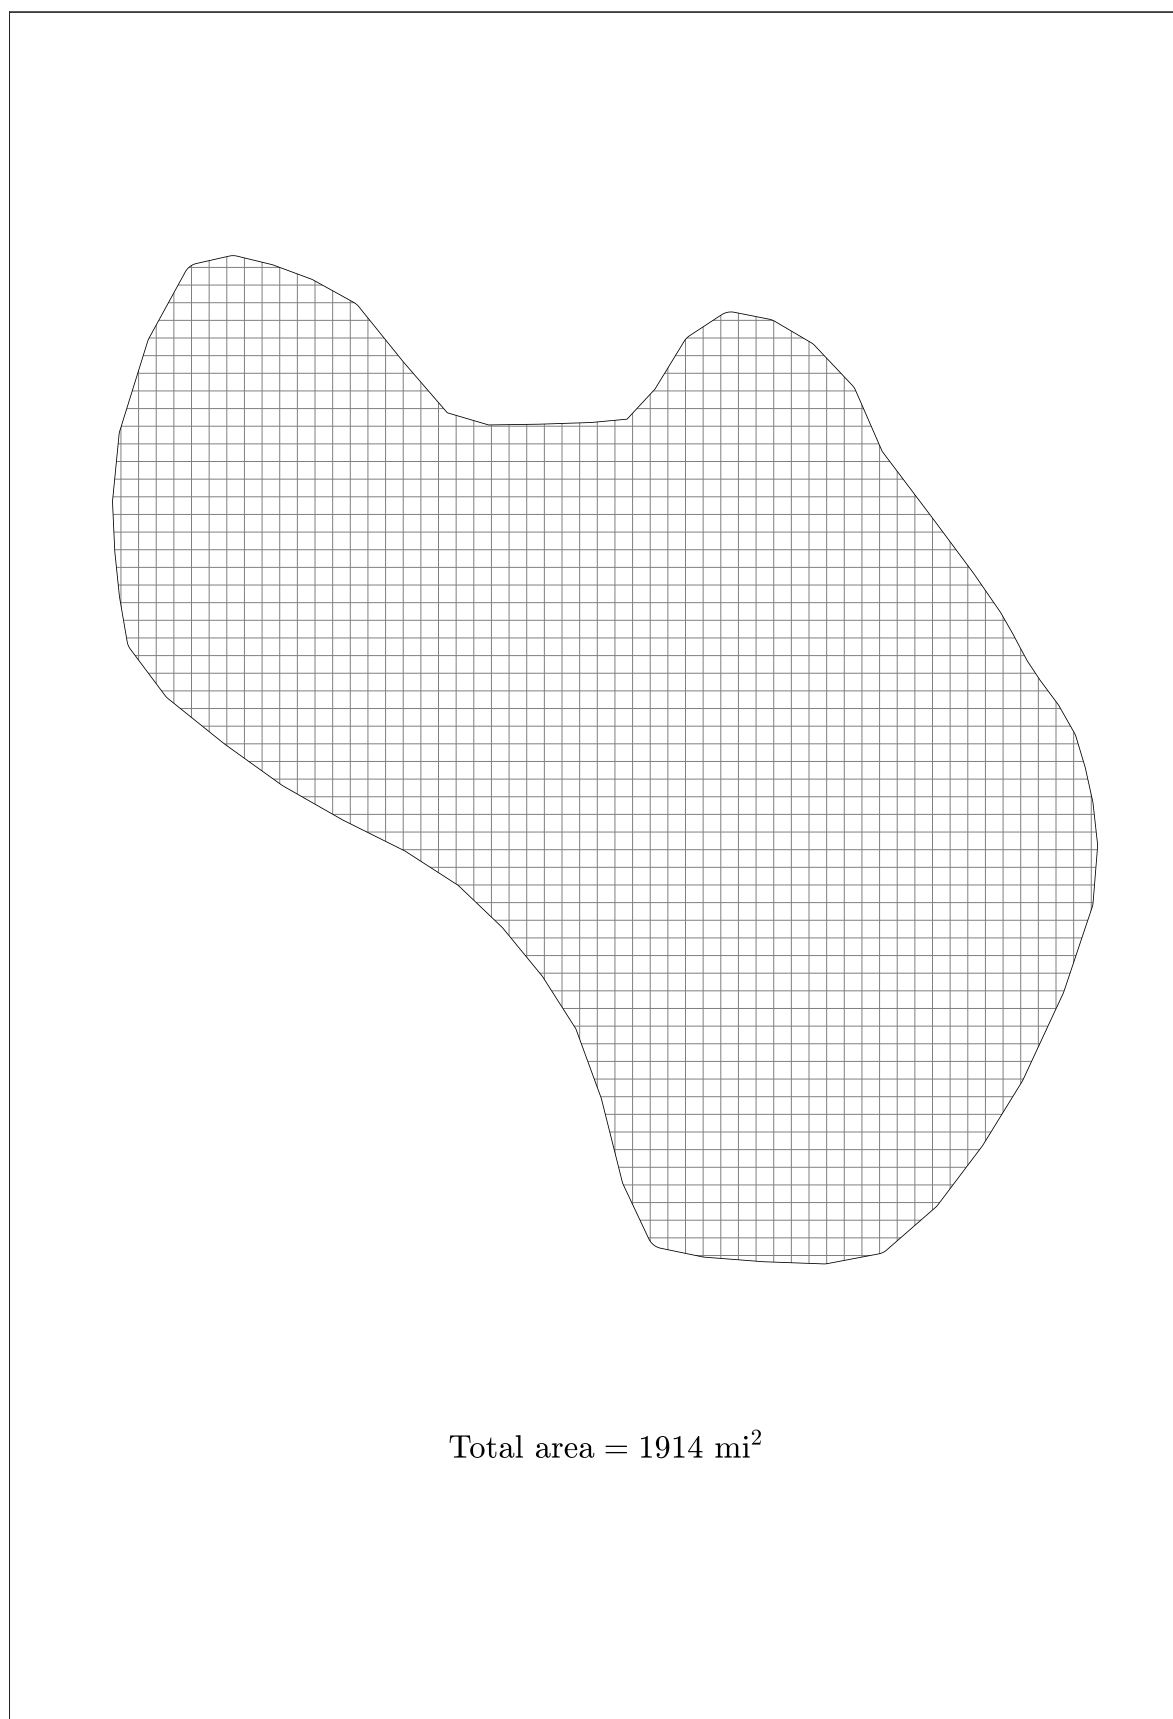

**Figure S16.** One-square-mile fishnet gridding of Three Forks core.

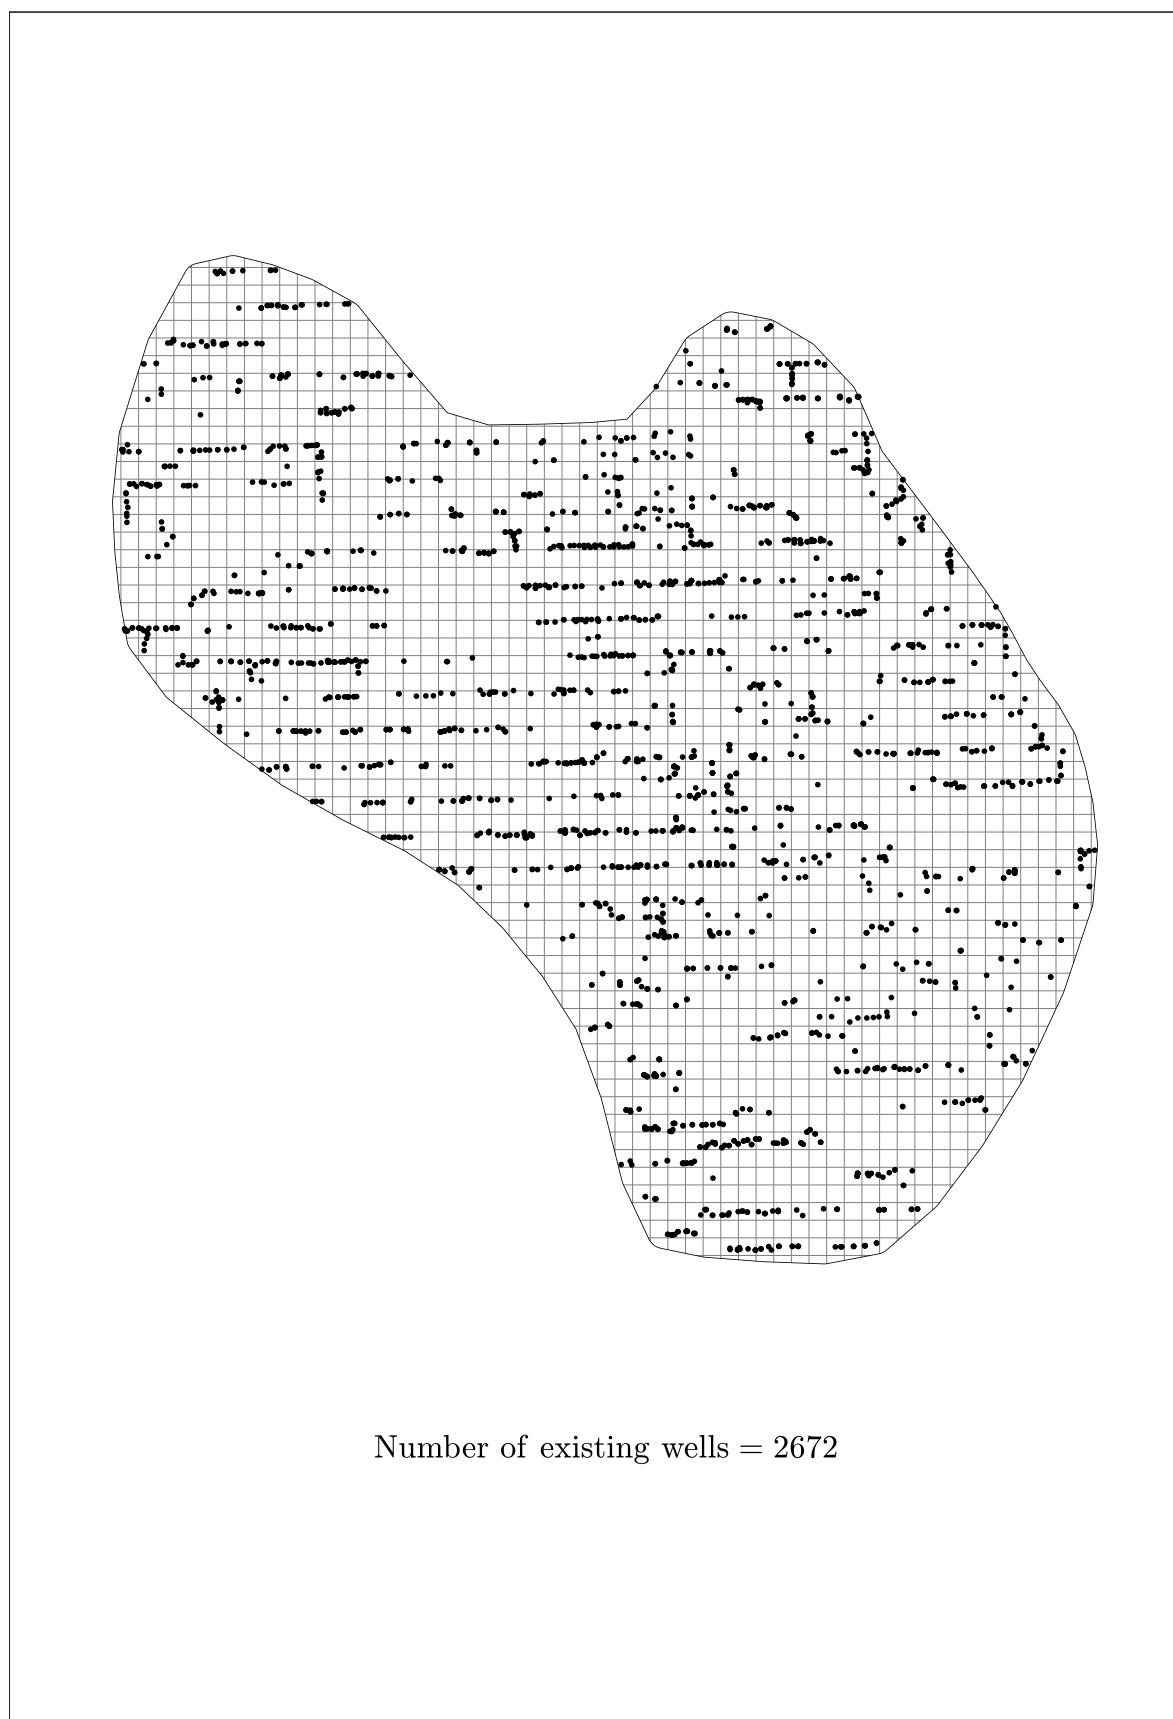

Figure S17. Map of wellhead locations in the Three Forks core.

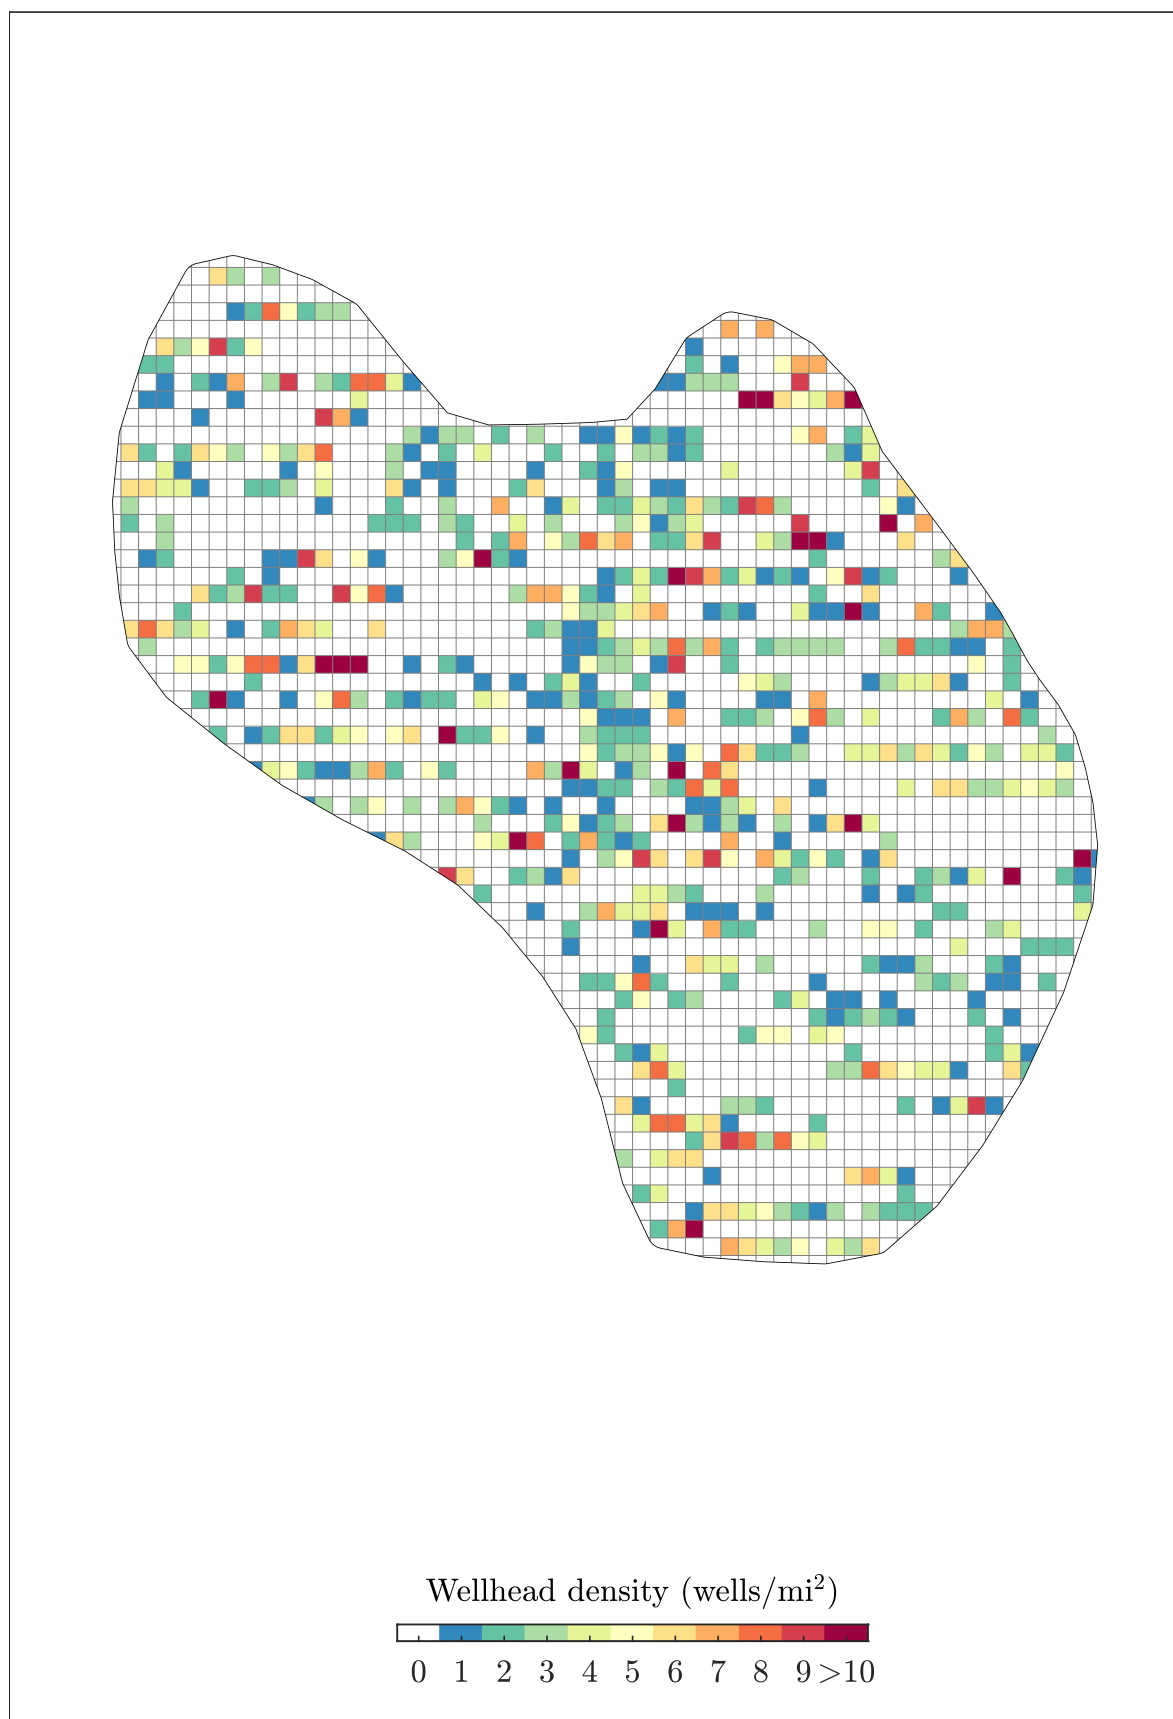**Figure S18.** Map of wellhead density in the Three Forks core.

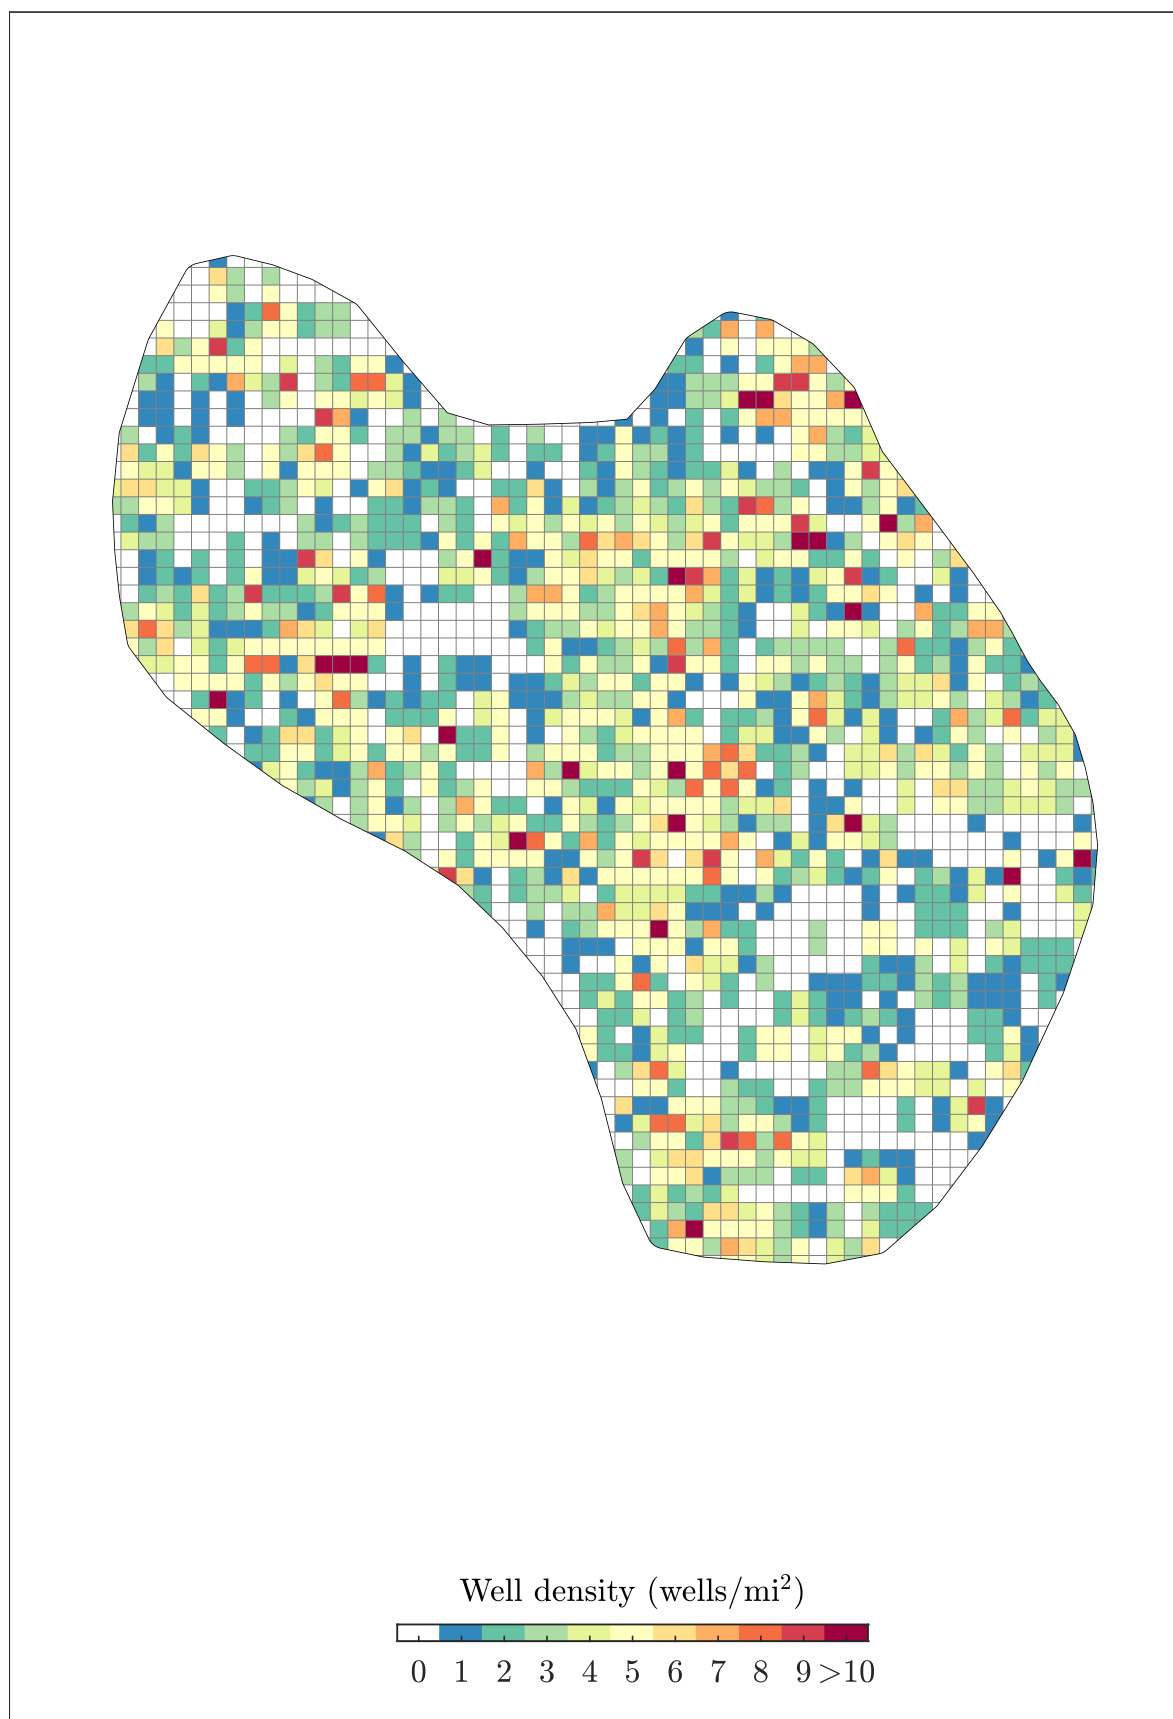**Figure S19.** Map of well density in the Three Forks core.

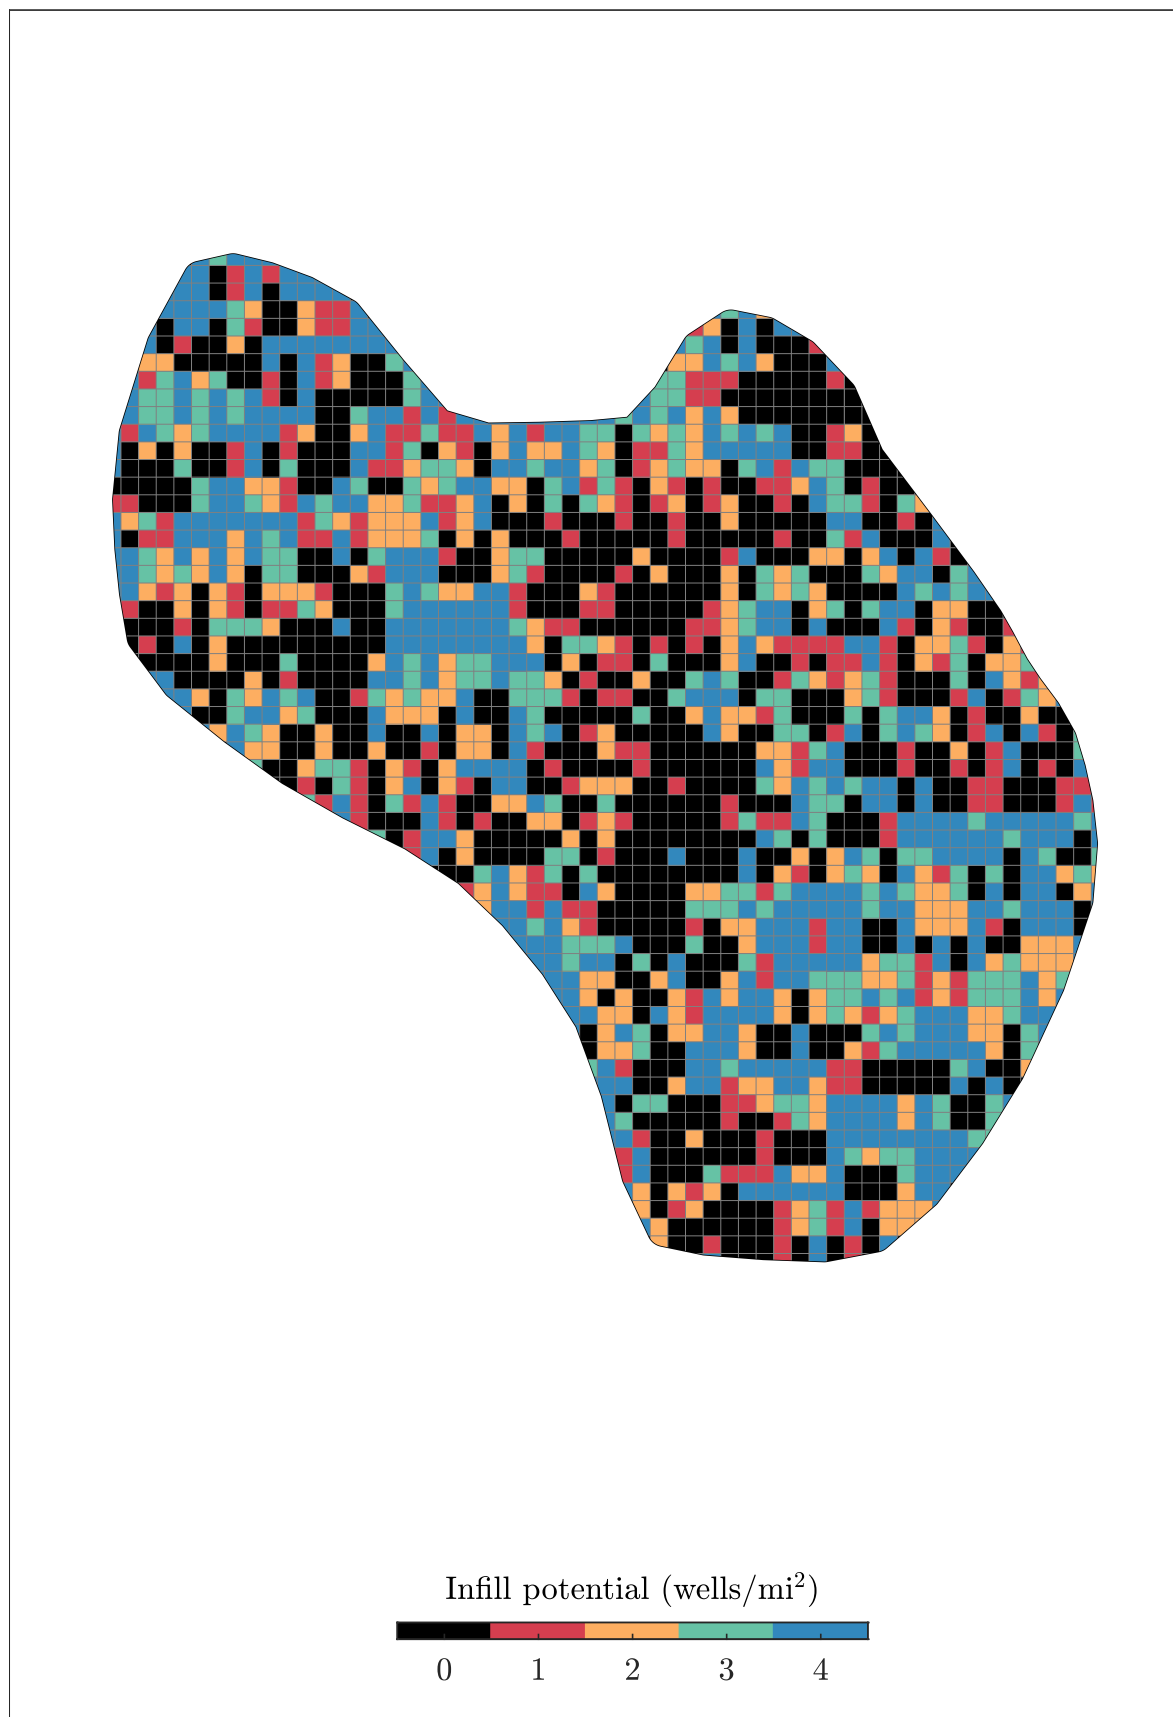

**Figure S20.** Map of infill potential in the Three Forks core.

**Table S1.** Infill drilling schedules

| Date      | Noncore area  |             | Core area     |             | Total infill wells |
|-----------|---------------|-------------|---------------|-------------|--------------------|
|           | Middle Bakken | Three Forks | Middle Bakken | Three Forks |                    |
| 7/1/2019  | 0             | 0           | 60            | 60          | 120                |
| 8/1/2019  | 0             | 0           | 60            | 60          | 240                |
| 9/1/2019  | 0             | 0           | 60            | 60          | 360                |
| 10/1/2019 | 0             | 0           | 60            | 60          | 480                |
| 11/1/2019 | 0             | 0           | 60            | 60          | 600                |
| 12/1/2019 | 0             | 0           | 60            | 60          | 720                |
| 1/1/2020  | 0             | 0           | 60            | 60          | 840                |
| 2/1/2020  | 0             | 0           | 60            | 60          | 960                |
| 3/1/2020  | 0             | 0           | 60            | 60          | 1080               |
| 4/1/2020  | 0             | 0           | 60            | 60          | 1200               |
| 5/1/2020  | 0             | 0           | 60            | 60          | 1320               |
| 6/1/2020  | 0             | 0           | 60            | 60          | 1440               |
| 7/1/2020  | 0             | 0           | 60            | 60          | 1560               |
| 8/1/2020  | 0             | 0           | 60            | 60          | 1680               |
| 9/1/2020  | 0             | 0           | 60            | 60          | 1800               |
| 10/1/2020 | 0             | 0           | 60            | 60          | 1920               |
| 11/1/2020 | 0             | 0           | 60            | 60          | 2040               |
| 12/1/2020 | 0             | 0           | 60            | 60          | 2160               |
| 1/1/2021  | 0             | 0           | 60            | 60          | 2280               |
| 2/1/2021  | 0             | 0           | 60            | 60          | 2400               |
| 3/1/2021  | 0             | 0           | 60            | 60          | 2520               |
| 4/1/2021  | 0             | 0           | 60            | 60          | 2640               |
| 5/1/2021  | 0             | 0           | 60            | 60          | 2760               |
| 6/1/2021  | 0             | 0           | 60            | 60          | 2880               |
| 7/1/2021  | 0             | 0           | 60            | 60          | 3000               |
| 8/1/2021  | 0             | 0           | 60            | 60          | 3120               |
| 9/1/2021  | 0             | 0           | 60            | 60          | 3240               |
| 10/1/2021 | 0             | 0           | 60            | 60          | 3360               |
| 11/1/2021 | 0             | 0           | 60            | 60          | 3480               |
| 12/1/2021 | 0             | 0           | 60            | 60          | 3600               |
| 1/1/2022  | 0             | 0           | 95            | 25          | 3720               |
| 2/1/2022  | 0             | 0           | 120           | 0           | 3840               |
| 3/1/2022  | 0             | 0           | 120           | 0           | 3960               |
| 4/1/2022  | 0             | 0           | 120           | 0           | 4080               |
| 5/1/2022  | 0             | 0           | 120           | 0           | 4200               |
| 6/1/2022  | 0             | 0           | 120           | 0           | 4320               |
| 7/1/2022  | 0             | 0           | 82            | 0           | 4402               |
| 8/1/2022  | 60            | 60          | 0             | 0           | 4522               |
| 9/1/2022  | 60            | 60          | 0             | 0           | 4642               |
| 10/1/2022 | 60            | 60          | 0             | 0           | 4762               |
| 11/1/2022 | 60            | 60          | 0             | 0           | 4882               |
| 12/1/2022 | 60            | 60          | 0             | 0           | 5002               |
| 1/1/2023  | 60            | 60          | 0             | 0           | 5122               |
| 2/1/2023  | 60            | 60          | 0             | 0           | 5242               |
| 3/1/2023  | 60            | 60          | 0             | 0           | 5362               |
| 4/1/2023  | 60            | 60          | 0             | 0           | 5482               |

|           |    |    |   |   |       |
|-----------|----|----|---|---|-------|
| 5/1/2023  | 60 | 60 | 0 | 0 | 5602  |
| 6/1/2023  | 60 | 60 | 0 | 0 | 5722  |
| 7/1/2023  | 60 | 60 | 0 | 0 | 5842  |
| 8/1/2023  | 60 | 60 | 0 | 0 | 5962  |
| 9/1/2023  | 60 | 60 | 0 | 0 | 6082  |
| 10/1/2023 | 60 | 60 | 0 | 0 | 6202  |
| 11/1/2023 | 60 | 60 | 0 | 0 | 6322  |
| 12/1/2023 | 60 | 60 | 0 | 0 | 6442  |
| 1/1/2024  | 60 | 60 | 0 | 0 | 6562  |
| 2/1/2024  | 60 | 60 | 0 | 0 | 6682  |
| 3/1/2024  | 60 | 60 | 0 | 0 | 6802  |
| 4/1/2024  | 60 | 60 | 0 | 0 | 6922  |
| 5/1/2024  | 60 | 60 | 0 | 0 | 7042  |
| 6/1/2024  | 60 | 60 | 0 | 0 | 7162  |
| 7/1/2024  | 60 | 60 | 0 | 0 | 7282  |
| 8/1/2024  | 60 | 60 | 0 | 0 | 7402  |
| 9/1/2024  | 60 | 60 | 0 | 0 | 7522  |
| 10/1/2024 | 60 | 60 | 0 | 0 | 7642  |
| 11/1/2024 | 60 | 60 | 0 | 0 | 7762  |
| 12/1/2024 | 60 | 60 | 0 | 0 | 7882  |
| 1/1/2025  | 60 | 60 | 0 | 0 | 8002  |
| 2/1/2025  | 60 | 60 | 0 | 0 | 8122  |
| 3/1/2025  | 60 | 60 | 0 | 0 | 8242  |
| 4/1/2025  | 60 | 60 | 0 | 0 | 8362  |
| 5/1/2025  | 60 | 60 | 0 | 0 | 8482  |
| 6/1/2025  | 60 | 60 | 0 | 0 | 8602  |
| 7/1/2025  | 60 | 60 | 0 | 0 | 8722  |
| 8/1/2025  | 60 | 60 | 0 | 0 | 8842  |
| 9/1/2025  | 60 | 60 | 0 | 0 | 8962  |
| 10/1/2025 | 60 | 60 | 0 | 0 | 9082  |
| 11/1/2025 | 60 | 60 | 0 | 0 | 9202  |
| 12/1/2025 | 60 | 60 | 0 | 0 | 9322  |
| 1/1/2026  | 60 | 60 | 0 | 0 | 9442  |
| 2/1/2026  | 60 | 60 | 0 | 0 | 9562  |
| 3/1/2026  | 60 | 60 | 0 | 0 | 9682  |
| 4/1/2026  | 60 | 60 | 0 | 0 | 9802  |
| 5/1/2026  | 60 | 60 | 0 | 0 | 9922  |
| 6/1/2026  | 60 | 60 | 0 | 0 | 10042 |
| 7/1/2026  | 60 | 60 | 0 | 0 | 10162 |
| 8/1/2026  | 60 | 60 | 0 | 0 | 10282 |
| 9/1/2026  | 60 | 60 | 0 | 0 | 10402 |
| 10/1/2026 | 60 | 60 | 0 | 0 | 10522 |
| 11/1/2026 | 60 | 60 | 0 | 0 | 10642 |
| 12/1/2026 | 60 | 60 | 0 | 0 | 10762 |
| 1/1/2027  | 60 | 60 | 0 | 0 | 10882 |
| 2/1/2027  | 60 | 60 | 0 | 0 | 11002 |
| 3/1/2027  | 60 | 60 | 0 | 0 | 11122 |
| 4/1/2027  | 60 | 60 | 0 | 0 | 11242 |
| 5/1/2027  | 60 | 60 | 0 | 0 | 11362 |
| 6/1/2027  | 60 | 60 | 0 | 0 | 11482 |

|           |    |    |   |   |       |
|-----------|----|----|---|---|-------|
| 7/1/2027  | 60 | 60 | 0 | 0 | 11602 |
| 8/1/2027  | 60 | 60 | 0 | 0 | 11722 |
| 9/1/2027  | 60 | 60 | 0 | 0 | 11842 |
| 10/1/2027 | 60 | 60 | 0 | 0 | 11962 |
| 11/1/2027 | 60 | 60 | 0 | 0 | 12082 |
| 12/1/2027 | 60 | 60 | 0 | 0 | 12202 |
| 1/1/2028  | 60 | 60 | 0 | 0 | 12322 |
| 2/1/2028  | 60 | 60 | 0 | 0 | 12442 |
| 3/1/2028  | 60 | 60 | 0 | 0 | 12562 |
| 4/1/2028  | 60 | 60 | 0 | 0 | 12682 |
| 5/1/2028  | 60 | 60 | 0 | 0 | 12802 |
| 6/1/2028  | 60 | 60 | 0 | 0 | 12922 |
| 7/1/2028  | 60 | 60 | 0 | 0 | 13042 |
| 8/1/2028  | 60 | 60 | 0 | 0 | 13162 |
| 9/1/2028  | 60 | 60 | 0 | 0 | 13282 |
| 10/1/2028 | 60 | 60 | 0 | 0 | 13402 |
| 11/1/2028 | 60 | 60 | 0 | 0 | 13522 |
| 12/1/2028 | 60 | 60 | 0 | 0 | 13642 |
| 1/1/2029  | 60 | 60 | 0 | 0 | 13762 |
| 2/1/2029  | 60 | 60 | 0 | 0 | 13882 |
| 3/1/2029  | 60 | 60 | 0 | 0 | 14002 |
| 4/1/2029  | 60 | 60 | 0 | 0 | 14122 |
| 5/1/2029  | 60 | 60 | 0 | 0 | 14242 |
| 6/1/2029  | 60 | 60 | 0 | 0 | 14362 |
| 7/1/2029  | 60 | 60 | 0 | 0 | 14482 |
| 8/1/2029  | 60 | 60 | 0 | 0 | 14602 |
| 9/1/2029  | 60 | 60 | 0 | 0 | 14722 |
| 10/1/2029 | 60 | 60 | 0 | 0 | 14842 |
| 11/1/2029 | 60 | 60 | 0 | 0 | 14962 |
| 12/1/2029 | 60 | 60 | 0 | 0 | 15082 |
| 1/1/2030  | 60 | 60 | 0 | 0 | 15202 |
| 2/1/2030  | 60 | 60 | 0 | 0 | 15322 |
| 3/1/2030  | 60 | 60 | 0 | 0 | 15442 |
| 4/1/2030  | 60 | 60 | 0 | 0 | 15562 |
| 5/1/2030  | 60 | 60 | 0 | 0 | 15682 |
| 6/1/2030  | 60 | 60 | 0 | 0 | 15802 |
| 7/1/2030  | 60 | 60 | 0 | 0 | 15922 |
| 8/1/2030  | 60 | 60 | 0 | 0 | 16042 |
| 9/1/2030  | 60 | 60 | 0 | 0 | 16162 |
| 10/1/2030 | 60 | 60 | 0 | 0 | 16282 |
| 11/1/2030 | 60 | 60 | 0 | 0 | 16402 |
| 12/1/2030 | 60 | 60 | 0 | 0 | 16522 |
| 1/1/2031  | 60 | 60 | 0 | 0 | 16642 |
| 2/1/2031  | 60 | 60 | 0 | 0 | 16762 |
| 3/1/2031  | 60 | 60 | 0 | 0 | 16882 |
| 4/1/2031  | 60 | 60 | 0 | 0 | 17002 |
| 5/1/2031  | 60 | 60 | 0 | 0 | 17122 |
| 6/1/2031  | 60 | 60 | 0 | 0 | 17242 |
| 7/1/2031  | 60 | 60 | 0 | 0 | 17362 |
| 8/1/2031  | 60 | 60 | 0 | 0 | 17482 |

|           |    |    |   |   |       |
|-----------|----|----|---|---|-------|
| 9/1/2031  | 60 | 60 | 0 | 0 | 17602 |
| 10/1/2031 | 60 | 60 | 0 | 0 | 17722 |
| 11/1/2031 | 60 | 60 | 0 | 0 | 17842 |
| 12/1/2031 | 60 | 60 | 0 | 0 | 17962 |
| 1/1/2032  | 60 | 60 | 0 | 0 | 18082 |
| 2/1/2032  | 60 | 60 | 0 | 0 | 18202 |
| 3/1/2032  | 60 | 60 | 0 | 0 | 18322 |
| 4/1/2032  | 60 | 60 | 0 | 0 | 18442 |
| 5/1/2032  | 60 | 60 | 0 | 0 | 18562 |
| 6/1/2032  | 60 | 60 | 0 | 0 | 18682 |
| 7/1/2032  | 60 | 60 | 0 | 0 | 18802 |
| 8/1/2032  | 60 | 60 | 0 | 0 | 18922 |
| 9/1/2032  | 60 | 60 | 0 | 0 | 19042 |
| 10/1/2032 | 60 | 60 | 0 | 0 | 19162 |
| 11/1/2032 | 60 | 60 | 0 | 0 | 19282 |
| 12/1/2032 | 60 | 60 | 0 | 0 | 19402 |
| 1/1/2033  | 60 | 60 | 0 | 0 | 19522 |
| 2/1/2033  | 60 | 60 | 0 | 0 | 19642 |
| 3/1/2033  | 60 | 60 | 0 | 0 | 19762 |
| 4/1/2033  | 60 | 60 | 0 | 0 | 19882 |
| 5/1/2033  | 60 | 60 | 0 | 0 | 20002 |
| 6/1/2033  | 60 | 60 | 0 | 0 | 20122 |
| 7/1/2033  | 60 | 60 | 0 | 0 | 20242 |
| 8/1/2033  | 60 | 60 | 0 | 0 | 20362 |
| 9/1/2033  | 60 | 60 | 0 | 0 | 20482 |
| 10/1/2033 | 60 | 60 | 0 | 0 | 20602 |
| 11/1/2033 | 60 | 60 | 0 | 0 | 20722 |
| 12/1/2033 | 60 | 60 | 0 | 0 | 20842 |
| 1/1/2034  | 60 | 60 | 0 | 0 | 20962 |
| 2/1/2034  | 60 | 60 | 0 | 0 | 21082 |
| 3/1/2034  | 60 | 60 | 0 | 0 | 21202 |
| 4/1/2034  | 60 | 60 | 0 | 0 | 21322 |
| 5/1/2034  | 60 | 60 | 0 | 0 | 21442 |
| 6/1/2034  | 60 | 60 | 0 | 0 | 21562 |
| 7/1/2034  | 60 | 60 | 0 | 0 | 21682 |
| 8/1/2034  | 60 | 60 | 0 | 0 | 21802 |
| 9/1/2034  | 60 | 60 | 0 | 0 | 21922 |
| 10/1/2034 | 60 | 60 | 0 | 0 | 22042 |
| 11/1/2034 | 60 | 60 | 0 | 0 | 22162 |
| 12/1/2034 | 60 | 60 | 0 | 0 | 22282 |
| 1/1/2035  | 60 | 60 | 0 | 0 | 22402 |
| 2/1/2035  | 60 | 60 | 0 | 0 | 22522 |
| 3/1/2035  | 60 | 60 | 0 | 0 | 22642 |
| 4/1/2035  | 60 | 60 | 0 | 0 | 22762 |
| 5/1/2035  | 60 | 60 | 0 | 0 | 22882 |
| 6/1/2035  | 60 | 60 | 0 | 0 | 23002 |
| 7/1/2035  | 60 | 60 | 0 | 0 | 23122 |
| 8/1/2035  | 60 | 60 | 0 | 0 | 23242 |
| 9/1/2035  | 60 | 60 | 0 | 0 | 23362 |
| 10/1/2035 | 60 | 60 | 0 | 0 | 23482 |

|           |     |    |   |   |       |
|-----------|-----|----|---|---|-------|
| 11/1/2035 | 60  | 60 | 0 | 0 | 23602 |
| 12/1/2035 | 60  | 60 | 0 | 0 | 23722 |
| 1/1/2036  | 60  | 60 | 0 | 0 | 23842 |
| 2/1/2036  | 60  | 60 | 0 | 0 | 23962 |
| 3/1/2036  | 60  | 60 | 0 | 0 | 24082 |
| 4/1/2036  | 60  | 60 | 0 | 0 | 24202 |
| 5/1/2036  | 60  | 60 | 0 | 0 | 24322 |
| 6/1/2036  | 60  | 60 | 0 | 0 | 24442 |
| 7/1/2036  | 60  | 60 | 0 | 0 | 24562 |
| 8/1/2036  | 60  | 60 | 0 | 0 | 24682 |
| 9/1/2036  | 60  | 60 | 0 | 0 | 24802 |
| 10/1/2036 | 60  | 60 | 0 | 0 | 24922 |
| 11/1/2036 | 60  | 60 | 0 | 0 | 25042 |
| 12/1/2036 | 60  | 60 | 0 | 0 | 25162 |
| 1/1/2037  | 60  | 60 | 0 | 0 | 25282 |
| 2/1/2037  | 60  | 60 | 0 | 0 | 25402 |
| 3/1/2037  | 60  | 60 | 0 | 0 | 25522 |
| 4/1/2037  | 60  | 60 | 0 | 0 | 25642 |
| 5/1/2037  | 60  | 60 | 0 | 0 | 25762 |
| 6/1/2037  | 60  | 60 | 0 | 0 | 25882 |
| 7/1/2037  | 60  | 60 | 0 | 0 | 26002 |
| 8/1/2037  | 60  | 60 | 0 | 0 | 26122 |
| 9/1/2037  | 60  | 60 | 0 | 0 | 26242 |
| 10/1/2037 | 60  | 60 | 0 | 0 | 26362 |
| 11/1/2037 | 60  | 60 | 0 | 0 | 26482 |
| 12/1/2037 | 60  | 60 | 0 | 0 | 26602 |
| 1/1/2038  | 60  | 60 | 0 | 0 | 26722 |
| 2/1/2038  | 60  | 60 | 0 | 0 | 26842 |
| 3/1/2038  | 60  | 60 | 0 | 0 | 26962 |
| 4/1/2038  | 60  | 60 | 0 | 0 | 27082 |
| 5/1/2038  | 60  | 60 | 0 | 0 | 27202 |
| 6/1/2038  | 60  | 60 | 0 | 0 | 27322 |
| 7/1/2038  | 60  | 60 | 0 | 0 | 27442 |
| 8/1/2038  | 60  | 60 | 0 | 0 | 27562 |
| 9/1/2038  | 60  | 60 | 0 | 0 | 27682 |
| 10/1/2038 | 60  | 60 | 0 | 0 | 27802 |
| 11/1/2038 | 60  | 60 | 0 | 0 | 27922 |
| 12/1/2038 | 60  | 60 | 0 | 0 | 28042 |
| 1/1/2039  | 60  | 60 | 0 | 0 | 28162 |
| 2/1/2039  | 60  | 60 | 0 | 0 | 28282 |
| 3/1/2039  | 60  | 60 | 0 | 0 | 28402 |
| 4/1/2039  | 60  | 60 | 0 | 0 | 28522 |
| 5/1/2039  | 60  | 60 | 0 | 0 | 28642 |
| 6/1/2039  | 60  | 60 | 0 | 0 | 28762 |
| 7/1/2039  | 60  | 60 | 0 | 0 | 28882 |
| 8/1/2039  | 60  | 60 | 0 | 0 | 29002 |
| 9/1/2039  | 79  | 41 | 0 | 0 | 29122 |
| 10/1/2039 | 120 | 0  | 0 | 0 | 29242 |
| 11/1/2039 | 120 | 0  | 0 | 0 | 29362 |
| 12/1/2039 | 120 | 0  | 0 | 0 | 29482 |

|           |     |   |   |   |       |
|-----------|-----|---|---|---|-------|
| 1/1/2040  | 120 | 0 | 0 | 0 | 29602 |
| 2/1/2040  | 120 | 0 | 0 | 0 | 29722 |
| 3/1/2040  | 120 | 0 | 0 | 0 | 29842 |
| 4/1/2040  | 120 | 0 | 0 | 0 | 29962 |
| 5/1/2040  | 120 | 0 | 0 | 0 | 30082 |
| 6/1/2040  | 120 | 0 | 0 | 0 | 30202 |
| 7/1/2040  | 120 | 0 | 0 | 0 | 30322 |
| 8/1/2040  | 120 | 0 | 0 | 0 | 30442 |
| 9/1/2040  | 120 | 0 | 0 | 0 | 30562 |
| 10/1/2040 | 120 | 0 | 0 | 0 | 30682 |
| 11/1/2040 | 120 | 0 | 0 | 0 | 30802 |
| 12/1/2040 | 112 | 0 | 0 | 0 | 30914 |

---
